# Supplementary material for: Sex-dependent prediction of autism
Source: Research Square preprint supplement (doi:10.21203/rs.3.rs-6323696/v1), 2025-07-23
Supplement: Supplementary file 1 [file 27b601dc2bd71a58de1145d4.docx]

**Supplementary Tables for Sex-dependent prediction of autism**

Catriona J. Miller, Jessie C. Jacobsen, Theo Portlock, Denis M. Nyaga, Justin M. O’Sullivan

**Supplementary Table S1:** SNPs with a Fisher p-value < 5x10-5 in the training dataset Pg 2-6

**Supplementary Table S2:** Autism-associated genes downloaded from SFARI database Pg 7-28

**Supplementary Table S3:** List of PRS SNPs from Grove et al. (2019) used in model Pg 29

**Supplementary Table S4:** Databases and software used in model development/analysis Pg 30

**Supplementary Table S5**: Metrics of the balanced model Pg 31

**Supplementary Table S6:** Autism-associated SFARI genes that were significant for females Pg 32

**Supplementary Table S7:** Autism-associated SFARI genes that were significant for males Pg33-34

| **Chr.**  **Supplementary Table 1:** SNPs with a Fisher p-value < 5x10-5 in the training dataset | **Position** |
| --- | --- |
| 2 | 1.32E+08 |
| 10 | 1.26E+08 |
| 10 | 1.26E+08 |
| 21 | 9080905 |
| 16 | 34121901 |
| 2 | 1.32E+08 |
| 10 | 1.26E+08 |
| 21 | 9055064 |
| 21 | 9069234 |
| 10 | 1.26E+08 |
| 1 | 5670699 |
| 2 | 1.32E+08 |
| 16 | 34146602 |
| 10 | 1.26E+08 |
| 16 | 34135315 |
| 16 | 34120022 |
| 16 | 34121699 |
| 21 | 9042086 |
| 3 | 96251376 |
| 1 | 5668303 |
| 1 | 5675588 |
| 23 | 58389786 |
| 10 | 1.26E+08 |
| 1 | 5671640 |
| 2 | 1.32E+08 |
| 21 | 9069658 |
| 9 | 33659083 |
| 10 | 1.26E+08 |
| 23 | 54429013 |
| 21 | 9047934 |
| 1 | 5671810 |
| 20 | 41209830 |
| 10 | 1.26E+08 |
| 1 | 889644 |
| 10 | 1.26E+08 |
| 10 | 1.26E+08 |
| 12 | 24178662 |
| 10 | 1.26E+08 |
| 2 | 94891054 |
| 23 | 9388941 |
| 15 | 56074027 |
| 21 | 9061332 |
| 16 | 34131621 |
| 16 | 34145852 |
| 16 | 34140173 |
| 10 | 1.26E+08 |
| 21 | 9082698 |
| 23 | 53846297 |
| 23 | 48965801 |
| 1 | 5668777 |
| 10 | 1.26E+08 |
| 23 | 62775511 |
| 23 | 1.41E+08 |
| 2 | 1.32E+08 |
| 10 | 1.26E+08 |
| 21 | 9061435 |
| 12 | 34215224 |
| 12 | 34215233 |
| 23 | 54429006 |
| 21 | 9071672 |
| 20 | 54906076 |
| 21 | 9064831 |
| 1 | 5673113 |
| 16 | 34130417 |
| 1 | 86661567 |
| 23 | 53846286 |
| 23 | 9388953 |
| 23 | 49083082 |
| 23 | 1.44E+08 |
| 15 | 47947929 |
| 10 | 1.26E+08 |
| 10 | 1.26E+08 |
| 18 | 29156641 |
| 12 | 9496633 |
| 16 | 34135293 |
| 1 | 5671772 |
| 21 | 9081388 |
| 10 | 7746050 |
| 10 | 1.26E+08 |
| 21 | 9082934 |
| 10 | 1.26E+08 |
| 21 | 9060804 |
| 21 | 9065940 |
| 23 | 6095091 |
| 16 | 34119836 |
| 23 | 1.11E+08 |
| 21 | 22699093 |
| 10 | 1.26E+08 |
| 21 | 9055150 |
| 10 | 1.26E+08 |
| 23 | 1.41E+08 |
| 16 | 34134200 |
| 21 | 9082519 |
| 10 | 1.26E+08 |
| 1 | 5670611 |
| 16 | 34131989 |
| 10 | 1.26E+08 |
| 10 | 1.25E+08 |
| 3 | 90323398 |
| 10 | 1.26E+08 |
| 10 | 1.26E+08 |
| 1 | 5675423 |
| 14 | 91431308 |
| 10 | 92247873 |
| 21 | 9055963 |
| 1 | 74716193 |
| 11 | 50778247 |
| 1 | 5670225 |
| 2 | 1.32E+08 |
| 13 | 1.1E+08 |
| 10 | 1.26E+08 |
| 1 | 15594720 |
| 16 | 34144838 |
| 21 | 10694067 |
| 23 | 1.24E+08 |
| 5 | 86940664 |
| 7 | 62672643 |
| 10 | 1.26E+08 |
| 5 | 1E+08 |
| 23 | 1.24E+08 |
| 10 | 1.26E+08 |
| 21 | 9065380 |
| 21 | 9070477 |
| 23 | 4774979 |
| 16 | 34122388 |
| 18 | 73020489 |
| 5 | 1E+08 |
| 1 | 889458 |
| 23 | 53615253 |
| 3 | 40812711 |
| 2 | 1.32E+08 |
| 5 | 1.24E+08 |
| 9 | 77482334 |
| 23 | 18496991 |
| 23 | 50208102 |
| 23 | 32379208 |
| 16 | 34122761 |
| 10 | 1.26E+08 |
| 16 | 34122989 |
| 10 | 1.26E+08 |
| 4 | 1.55E+08 |
| 11 | 86649482 |
| 1 | 1.54E+08 |
| 2 | 1.32E+08 |
| 4 | 1.55E+08 |
| 1 | 5675546 |
| 21 | 9075244 |
| 1 | 5671609 |
| 5 | 1.24E+08 |
| 13 | 1.1E+08 |
| 1 | 890921 |
| 23 | 1238922 |
| 5 | 1.24E+08 |
| 8 | 1.14E+08 |
| 23 | 50209308 |
| 3 | 1.33E+08 |
| 4 | 6075226 |
| 15 | 56071590 |
| 10 | 1.26E+08 |
| 16 | 34136883 |
| 5 | 1.41E+08 |
| 21 | 9068512 |
| 21 | 10691688 |
| 10 | 1.26E+08 |
| 10 | 1.26E+08 |
| 23 | 53846283 |
| 21 | 9071369 |
| 10 | 21855804 |
| 23 | 54351311 |
| 23 | 52669057 |
| 1 | 30513664 |
| 1 | 5671016 |
| 3 | 72056125 |
| 23 | 1.21E+08 |
| 4 | 1.12E+08 |
| 5 | 1.57E+08 |
| 4 | 1.85E+08 |
| 2 | 1.32E+08 |
| 10 | 1.26E+08 |
| 21 | 9066876 |
| 23 | 1.37E+08 |
| 19 | 4951134 |
| 4 | 1.9E+08 |
| 16 | 34144785 |
| 23 | 91531529 |
| 23 | 48671173 |
| 3 | 90323388 |
| 23 | 1.31E+08 |
| 8 | 33904150 |
| 4 | 1.3E+08 |
| 10 | 1.26E+08 |
| 15 | 33147165 |
| 23 | 1.17E+08 |
| 5 | 1.62E+08 |
| 10 | 1.26E+08 |
| 23 | 86199411 |
| 6 | 28125215 |
| 1 | 2.43E+08 |
| 14 | 1.04E+08 |
| 21 | 9072127 |
| 16 | 84556981 |
| 10 | 1.25E+08 |
| 5 | 65106321 |
| 10 | 1.26E+08 |
| 13 | 36916207 |
| 16 | 34122930 |
| 17 | 47137277 |
| 1 | 1.64E+08 |
| 23 | 1.3E+08 |
| 23 | 4774957 |
| 4 | 21104164 |
| 23 | 1.04E+08 |
| 23 | 97035941 |
| 23 | 1.32E+08 |
| 15 | 22286256 |
| 10 | 1.26E+08 |
| 1 | 5671258 |
| 15 | 99833091 |
| 15 | 65825270 |
| 23 | 1.34E+08 |
| 10 | 1.26E+08 |
| 15 | 22285319 |
| 5 | 1.71E+08 |
| 12 | 37804008 |
| 5 | 1751594 |
| 10 | 1.26E+08 |
| 17 | 22525005 |
| 23 | 12957754 |
| 1 | 5672052 |
| 16 | 34139900 |
| 10 | 1.26E+08 |
| 5 | 1.48E+08 |
| 11 | 94646026 |
| 23 | 24199260 |
| 2 | 2.09E+08 |
| 9 | 33659046 |
| 9 | 1.08E+08 |
| 13 | 67237466 |
| 23 | 53565636 |
| 23 | 18397550 |
| 16 | 34145854 |
| 1 | 1.96E+08 |
| 11 | 89430686 |
| 4 | 1.44E+08 |
| 5 | 79540111 |
| 9 | 20081144 |
| 20 | 57358702 |
| 23 | 1.37E+08 |
| 4 | 1.9E+08 |
| 23 | 62697920 |
| 10 | 1.26E+08 |
| 16 | 34131872 |
| 21 | 9057487 |
| 1 | 5672042 |
| 21 | 9070346 |
| 1 | 5670063 |
| 23 | 62697907 |
| 3 | 1.47E+08 |
| 4 | 57899064 |
| 5 | 1E+08 |
| 8 | 89164103 |
| 22 | 36472874 |
| 19 | 13240749 |
| 10 | 1.26E+08 |
| 15 | 56073149 |
| 1 | 5672059 |
| 23 | 1.36E+08 |
| 1 | 5671397 |
| 16 | 34124301 |
| 16 | 34139401 |
| 23 | 1.4E+08 |
| 16 | 34132960 |
| 8 | 57485335 |
| 13 | 1.14E+08 |
| 21 | 9068438 |
| 23 | 95821599 |
| 1 | 5670075 |
| 5 | 55553638 |
| 17 | 22524362 |
| 6 | 76728610 |
| 6 | 95898384 |
| 23 | 82396178 |
| 4 | 1.9E+08 |
| 7 | 92880096 |
| 10 | 7322606 |
| 9 | 1.21E+08 |
| 15 | 56073189 |
| 4 | 1.08E+08 |
| 5 | 62245109 |
| 23 | 23968713 |
| 9 | 11859841 |
| 10 | 1.26E+08 |
| 21 | 9079674 |
| 20 | 50051668 |
| 7 | 98897933 |
| 23 | 48671139 |
| 2 | 94909358 |
| 10 | 1.26E+08 |
| 21 | 9075267 |
| 16 | 34145965 |
| 8 | 82559619 |
| 4 | 1.53E+08 |
| 23 | 2890550 |
| 7 | 24847870 |
| 9 | 1.26E+08 |
| 11 | 11089318 |
| 4 | 1.34E+08 |
| 10 | 1.26E+08 |
| 6 | 13083376 |
| 23 | 65630178 |
| 17 | 59341527 |
| 23 | 37653919 |
| 23 | 39712629 |
| 17 | 59935624 |
| 21 | 9038680 |
| 10 | 1.26E+08 |
| 23 | 4422318 |
| 2 | 88652621 |
| 23 | 1.44E+08 |
| 10 | 1.33E+08 |
| 8 | 24955444 |
| 9 | 94999783 |
| 6 | 25526342 |
| 16 | 34134070 |
| 6 | 84544333 |
| 23 | 3415509 |
| 14 | 94875731 |
| 17 | 79280173 |
| 23 | 1.55E+08 |
| 2 | 1.45E+08 |
| 18 | 32061174 |
| 21 | 9077729 |
| 11 | 55146501 |
| 23 | 1.15E+08 |
| 16 | 34136906 |
| 1 | 2.35E+08 |
| 2 | 53414678 |
| 10 | 1.26E+08 |
| 5 | 1.24E+08 |
| 15 | 29843608 |
| 15 | 46426536 |
| 1 | 1.92E+08 |
| 4 | 76372998 |
| 13 | 1.07E+08 |
| 3 | 74916179 |
| 10 | 41829322 |
| 1 | 5666512 |
| 10 | 1.26E+08 |
| 8 | 36114253 |
| 15 | 22282362 |
| 16 | 34121061 |
| 20 | 21176178 |
| 2 | 1.35E+08 |
| 3 | 99213245 |
| 9 | 33659120 |
| 16 | 36020425 |
| 3 | 96618064 |
| 1 | 2.21E+08 |
| 10 | 70191412 |
| 16 | 23760344 |
| 11 | 1.17E+08 |
| 4 | 661042 |
| 6 | 26921866 |
| 1 | 1.98E+08 |
| 20 | 34356069 |
| 23 | 67953245 |
| 2 | 64699404 |
| 6 | 47102019 |
| 7 | 1.39E+08 |
| 9 | 1.1E+08 |
| 10 | 29626892 |
| 16 | 34120713 |
| 4 | 31646107 |
| 15 | 56073578 |
| 16 | 34139538 |
| 19 | 46207387 |
| 1 | 5672832 |
| 21 | 9065306 |
| 5 | 1.43E+08 |
| 7 | 13319525 |
| 7 | 70728576 |
| 23 | 1.35E+08 |
| 16 | 34130931 |
| 17 | 49304038 |
| 23 | 62688966 |
| 8 | 1.33E+08 |
| 12 | 38090373 |
| 21 | 9039757 |
| 23 | 53346131 |
| 23 | 5021817 |
| 15 | 84251808 |
| 23 | 1.2E+08 |
| 5 | 52965836 |
| 5 | 62480204 |
| 21 | 46340245 |
| 5 | 98987898 |
| 1 | 82958705 |
| 8 | 81352399 |
| 4 | 1.35E+08 |
| 6 | 61349063 |
| 11 | 50778275 |
| 1 | 24893778 |
| 7 | 21895879 |
| 1 | 2.34E+08 |
| 1 | 5672722 |
| 10 | 1.26E+08 |
| 10 | 1.26E+08 |
| 16 | 34121570 |
| 1 | 85510785 |
| 23 | 1.23E+08 |
| 6 | 82301938 |
| 8 | 70813826 |
| 1 | 1.17E+08 |
| 15 | 1.01E+08 |
| 1 | 5668886 |
| 11 | 67527816 |
| 16 | 55905453 |
| 5 | 1.29E+08 |
| 3 | 44937990 |
| 9 | 1.37E+08 |
| 23 | 70986304 |
| 23 | 90491922 |
| 16 | 34144915 |
| 2 | 2.41E+08 |
| 15 | 62017085 |
| 5 | 53653663 |
| 21 | 9061559 |
| 3 | 75669504 |
| 16 | 34146395 |
| 16 | 34155168 |
| 5 | 1.51E+08 |
| 9 | 9833866 |
| 12 | 7530057 |
| 21 | 9038671 |
| 13 | 42617936 |
| 4 | 1.9E+08 |
| 10 | 1.26E+08 |
| 5 | 17239243 |
| 1 | 24491712 |
| 10 | 1.26E+08 |
| 16 | 34130593 |
| 23 | 1E+08 |
| 23 | 1.03E+08 |
| 23 | 65167035 |
| 12 | 1.12E+08 |
| 16 | 34138857 |
| 23 | 69635718 |
| 23 | 71675188 |
| 16 | 32513018 |
| 23 | 79301623 |
| 23 | 47600202 |
| 2 | 16009488 |
| 4 | 1.47E+08 |
| 5 | 86967520 |
| 10 | 98985234 |
| 17 | 73594490 |
| 23 | 1.08E+08 |
| 4 | 1.65E+08 |
| 23 | 19892748 |
| 2 | 1.32E+08 |
| 3 | 48451057 |
| 10 | 15144599 |
| 11 | 74289757 |
| 12 | 1.01E+08 |
| 21 | 9073520 |
| 3 | 1.54E+08 |
| 16 | 4627948 |
| 23 | 41670758 |
| 23 | 1.15E+08 |
| 19 | 12429289 |
| 8 | 1.05E+08 |
| 10 | 1.26E+08 |
| 1 | 2.38E+08 |
| 3 | 1.23E+08 |
| 17 | 22735649 |
| 6 | 1.2E+08 |
| 23 | 15351282 |
| 14 | 78222333 |
| 16 | 32513001 |
| 23 | 1.28E+08 |
| 5 | 1.29E+08 |
| 13 | 1.09E+08 |
| 23 | 52862483 |
| 6 | 47329696 |
| 8 | 1.45E+08 |
| 11 | 1.08E+08 |
| 16 | 34123102 |
| 23 | 46548965 |
| 10 | 49583330 |
| 23 | 53601185 |
| 20 | 31372417 |
| 23 | 98147316 |
| 5 | 1.27E+08 |
| 16 | 17407843 |
| 17 | 48110829 |
| 9 | 7100339 |
| 11 | 50778268 |
| 23 | 13518375 |
| 23 | 1.1E+08 |
| 13 | 63417206 |
| 4 | 2826540 |
| 11 | 1.32E+08 |
| 10 | 34105407 |
| 7 | 1.05E+08 |
| 1 | 1.93E+08 |
| 5 | 1.02E+08 |
| 5 | 1.79E+08 |
| 6 | 1.52E+08 |
| 10 | 59472486 |
| 23 | 9270996 |
| 16 | 34119838 |
| 23 | 97767223 |
| 1 | 44438098 |
| 1 | 1.16E+08 |
| 2 | 1.33E+08 |
| 6 | 1.04E+08 |
| 6 | 1.39E+08 |
| 16 | 34132582 |
| 18 | 30083010 |
| 13 | 23369694 |
| 21 | 9070867 |
| 23 | 1.01E+08 |
| 19 | 27435975 |
| 1 | 1.05E+08 |
| 8 | 1.36E+08 |
| 1 | 68923742 |
| 23 | 1.07E+08 |
| 23 | 1.21E+08 |
| 2 | 99484430 |
| 19 | 43118525 |
| 6 | 60540429 |
| 23 | 1.5E+08 |
| 3 | 34867130 |
| 5 | 50246708 |
| 11 | 14047426 |
| 12 | 59226737 |
| 12 | 89367710 |
| 17 | 82746804 |
| 22 | 44213576 |
| 23 | 51048668 |
| 7 | 97210420 |
| 12 | 37804051 |
| 7 | 56148296 |
| 1 | 65684827 |
| 5 | 37554637 |
| 3 | 90300338 |
| 2 | 1.53E+08 |
| 12 | 94993526 |
| 3 | 1.53E+08 |
| 21 | 9056029 |
| 2 | 55708846 |
| 5 | 16946817 |
| 18 | 41710724 |
| 23 | 1.42E+08 |
| 23 | 48486610 |
| 4 | 61776050 |
| 16 | 34130403 |
| 16 | 69073823 |
| 12 | 37675552 |
| 23 | 915996 |
| 8 | 51818210 |
| 23 | 31960058 |
| 16 | 34133232 |
| 17 | 65859889 |
| 21 | 9073107 |
| 10 | 1770509 |
| 8 | 1.2E+08 |
| 11 | 58873421 |
| 15 | 65536625 |
| 23 | 54428999 |
| 1 | 9260232 |
| 3 | 1.16E+08 |
| 1 | 5672322 |
| 20 | 1044009 |
| 12 | 45899787 |
| 19 | 33187315 |
| 6 | 88299046 |
| 15 | 81788524 |
| 21 | 9059193 |
| 1 | 1.66E+08 |
| 4 | 6211667 |
| 5 | 1.29E+08 |
| 6 | 75096764 |
| 8 | 33013465 |
| 14 | 29128098 |
| 5 | 51630400 |
| 15 | 84253957 |
| 23 | 64072732 |
| 23 | 46738105 |
| 23 | 51048673 |
| 6 | 61349049 |
| 12 | 34265450 |
| 15 | 56072093 |
| 11 | 10509093 |
| 2 | 2.09E+08 |
| 23 | 1.3E+08 |
| 7 | 97263771 |
| 11 | 55225171 |
| 23 | 50208979 |
| 3 | 1.38E+08 |
| 23 | 54587673 |
| 23 | 40900999 |
| 23 | 50206901 |
| 23 | 87953689 |
| 6 | 1.27E+08 |
| 8 | 98028736 |
| 23 | 3772690 |
| 23 | 526867 |
| 23 | 1.27E+08 |
| 11 | 75428346 |
| 10 | 1.26E+08 |
| 10 | 1.26E+08 |
| 2 | 1.32E+08 |
| 11 | 1.2E+08 |
| 15 | 52904296 |
| 4 | 1.75E+08 |
| 23 | 29309801 |
| 12 | 11289403 |
| 23 | 10007583 |
| 23 | 71328971 |
| 23 | 52863223 |
| 3 | 48236522 |
| 15 | 72418282 |
| 16 | 34123163 |
| 10 | 1.26E+08 |
| 11 | 65370569 |
| 23 | 49142514 |
| 1 | 5670143 |
| 1 | 2.04E+08 |
| 6 | 1.25E+08 |
| 8 | 1.41E+08 |
| 10 | 1.26E+08 |
| 3 | 1.23E+08 |
| 23 | 24416449 |
| 2 | 1.55E+08 |
| 19 | 53127884 |
| 13 | 1.14E+08 |
| 21 | 9058990 |
| 23 | 39798707 |
| 10 | 1.26E+08 |
| 11 | 25077561 |
| 23 | 25398138 |
| 4 | 28410388 |
| 11 | 60884094 |
| 23 | 15435257 |
| 23 | 49140610 |
| 17 | 47136743 |
| 1 | 37105607 |
| 6 | 61349058 |
| 21 | 37315172 |
| 2 | 58316613 |
| 3 | 54285317 |
| 14 | 47645644 |
| 2 | 1.32E+08 |
| 16 | 34145282 |
| 17 | 37617983 |
| 6 | 60617169 |
| 7 | 588402 |
| 2 | 1.48E+08 |
| 16 | 34122888 |
| 10 | 1.26E+08 |
| 5 | 53852977 |
| 11 | 74211932 |
| 1 | 10871125 |
| 6 | 1.53E+08 |
| 17 | 65003909 |
| 2 | 1.32E+08 |
| 3 | 1.72E+08 |
| 5 | 1.38E+08 |
| 10 | 22800285 |
| 10 | 64806052 |
| 18 | 31190232 |
| 2 | 87036004 |
| 9 | 1.34E+08 |
| 14 | 1.04E+08 |
| 1 | 5262807 |
| 12 | 1.31E+08 |
| 16 | 34132623 |
| 3 | 1.2E+08 |
| 6 | 1.11E+08 |
| 11 | 1.06E+08 |
| 23 | 52862536 |
| 23 | 1.48E+08 |
| 19 | 50507032 |
| 6 | 1.15E+08 |
| 13 | 86871700 |
| 16 | 34121751 |
| 21 | 9073123 |
| 23 | 86078259 |
| 23 | 10991342 |
| 11 | 9997646 |
| 23 | 40997357 |
| 21 | 28969089 |
| 23 | 1.19E+08 |
| 4 | 1.09E+08 |
| 16 | 70599531 |
| 6 | 35604934 |
| 13 | 35000709 |
| 5 | 1.65E+08 |
| 21 | 9070385 |
| 1 | 5671351 |
| 7 | 81589320 |
| 9 | 1.13E+08 |
| 18 | 41423594 |
| 5 | 1E+08 |
| 6 | 9886051 |
| 8 | 4788468 |
| 15 | 20318829 |
| 5 | 1.05E+08 |
| 3 | 1.54E+08 |
| 23 | 18646152 |
| 23 | 49141554 |
| 23 | 50207702 |
| 1 | 2.34E+08 |
| 8 | 1.38E+08 |
| 23 | 16805279 |
| 23 | 4273584 |
| 23 | 97155273 |
| 2 | 70846034 |
| 2 | 2.13E+08 |
| 10 | 20752744 |
| 11 | 36374448 |
| 15 | 65407289 |
| 1 | 2.43E+08 |
| 11 | 83415561 |
| 17 | 34789765 |
| 17 | 42924484 |
| 10 | 1.25E+08 |
| 12 | 37804032 |
| 1 | 5672588 |
| 21 | 9071634 |
| 13 | 80466998 |
| 1 | 1.88E+08 |
| 16 | 34121837 |
| 19 | 599656 |
| 10 | 98021010 |
| 23 | 68464867 |
| 17 | 30509125 |
| 19 | 9601882 |
| 7 | 62536585 |
| 21 | 9068759 |
| 2 | 84159208 |
| 4 | 99816782 |
| 5 | 1.73E+08 |
| 15 | 56072068 |
| 2 | 1.32E+08 |
| 2 | 2.3E+08 |
| 2 | 71790614 |
| 1 | 5672384 |
| 10 | 1.26E+08 |
| 1 | 5671654 |
| 12 | 34254289 |
| 16 | 34122197 |
| 15 | 62378860 |
| 1 | 6984062 |
| 23 | 70170124 |
| 22 | 48643147 |
| 19 | 13803560 |
| 21 | 9040071 |
| 23 | 1.47E+08 |
| 1 | 77001402 |
| 2 | 1.58E+08 |
| 5 | 25307473 |
| 5 | 50251713 |
| 5 | 1E+08 |
| 5 | 1.38E+08 |
| 11 | 55224862 |
| 11 | 55225179 |
| 12 | 67178225 |
| 13 | 96404903 |
| 16 | 34133148 |
| 4 | 1.54E+08 |
| 3 | 58279086 |
| 8 | 43917896 |
| 13 | 55134070 |
| 19 | 27298423 |
| 22 | 24170070 |
| 23 | 14888191 |
| 8 | 68613747 |
| 17 | 22524371 |
| 3 | 75669364 |
| 6 | 47191506 |
| 1 | 9521884 |
| 1 | 33054231 |
| 4 | 70452286 |
| 16 | 34140076 |
| 19 | 1928454 |
| 15 | 40050810 |
| 5 | 37934002 |
| 10 | 1.26E+08 |
| 23 | 547917 |

| **Supplementary Table S2:** Autism-associated genes downloaded from SFARI database | | | | | |
| --- | --- | --- | --- | --- | --- |
| **Chr.** | **Start Position** | **End Position** | **Gene** | **SFARI severity** | **Syndromic** |
| 16 | 8674596 | 8784575 | ABAT | 2 | 0 |
| 17 | 69147214 | 69244846 | ABCA10 | 2 | 0 |
| 7 | 48171458 | 48647497 | ABCA13 | 2 | 0 |
| 19 | 1039997 | 1065572 | ABCA7 | 2 | 0 |
| 4 | 145098288 | 145129524 | ABCE1 | 1 | 1 |
| 1 | 179099330 | 179229684 | ABL2 | 1 | 0 |
| 17 | 63477061 | 63498380 | ACE | 2 | 0 |
| 7 | 100889994 | 100896974 | ACHE | 2 | 0 |
| 7 | 5526409 | 5563902 | ACTB | 2 | 0 |
| 7 | 100643097 | 100656448 | ACTL6B | 2 | 1 |
| 19 | 38647649 | 38731589 | ACTN4 | 2 | 1 |
| 3 | 51983340 | 51989197 | ACY1 | 2 | 0 |
| 2 | 24819169 | 24920237 | ADCY3 | 1 | 0 |
| 3 | 123282296 | 123449090 | ADCY5 | 2 | 0 |
| 19 | 14147743 | 14206187 | ADGRL1 | 1 | 1 |
| 10 | 74151202 | 74709963 | ADK | 2 | 0 |
| 20 | 50888916 | 50931437 | ADNP | 2 | 0 |
| 22 | 24417879 | 24442357 | ADORA2A | 2 | 0 |
| 1 | 111499429 | 111503633 | ADORA3 | 2 | 0 |
| 5 | 148826611 | 148828623 | ADRB2 | 2 | 0 |
| 22 | 40346461 | 40390463 | ADSL | 2 | 0 |
| 1 | 244408494 | 244451909 | ADSS2 | 3 | 1 |
| 2 | 235494043 | 236131793 | AGAP1 | 2 | 0 |
| 12 | 57723761 | 57742157 | AGAP2 | 2 | 0 |
| 10 | 73674287 | 73698109 | AGAP5 | 3 | 0 |
| 1 | 48532854 | 50023954 | AGBL4 | 3 | 0 |
| 7 | 15200317 | 15562015 | AGMO | 1 | 0 |
| 1 | 35869808 | 35930532 | AGO1 | 2 | 1 |
| 8 | 140520156 | 140635633 | AGO2 | 2 | 0 |
| 1 | 35930718 | 36072500 | AGO3 | 2 | 0 |
| 1 | 35808016 | 35857890 | AGO4 | 2 | 0 |
| 1 | 27534035 | 27604431 | AHDC1 | 3 | 1 |
| 6 | 135283407 | 135498434 | AHI1 | 2 | 1 |
| 11 | 62433542 | 62556235 | AHNAK | 2 | 0 |
| 7 | 91940840 | 92110673 | AKAP9 | 1 | 1 |
| 15 | 100877714 | 100916626 | ALDH1A3 | 2 | 0 |
| 3 | 126103562 | 126197994 | ALDH1L1 | 2 | 0 |
| 6 | 24494867 | 24537207 | ALDH5A1 | 2 | 0 |
| 1 | 63367575 | 63438553 | ALG6 | 3 | 0 |
| 1 | 114673090 | 114695618 | AMPD1 | 1 | 0 |
| 3 | 49416778 | 49422685 | AMT |  | 1 |
| 4 | 112818032 | 113384221 | ANK2 | 2 | 0 |
| 10 | 60026298 | 60733490 | ANK3 | 2 | 0 |
| 16 | 89267630 | 89490561 | ANKRD11 | 2 | 0 |
| 4 | 73073376 | 73258798 | ANKRD17 | 2 | 0 |
| 12 | 98726457 | 99984936 | ANKS1B |  | 1 |
| 15 | 68778535 | 68820897 | ANP32A |  | 1 |
| 9 | 73151865 | 73170393 | ANXA1 | 2 | 0 |
| 3 | 184174689 | 184184214 | AP2M1 | 2 | 0 |
| 19 | 46838136 | 46850846 | AP2S1 | 2 | 0 |
| 15 | 28884483 | 29118315 | APBA2 | 2 | 0 |
| 11 | 6395125 | 6419414 | APBB1 | 2 | 0 |
| 1 | 150265399 | 150269580 | APH1A | 3 | 0 |
| 12 | 48935723 | 48957487 | ARF3 | 2 | 0 |
| 15 | 30624494 | 30649529 | ARHGAP11B | 2 | 0 |
| 11 | 128965060 | 129279324 | ARHGAP32 | 1 | 1 |
| 14 | 32076114 | 32159728 | ARHGAP5 | 1 | 0 |
| 8 | 1823926 | 1958641 | ARHGEF10 | 2 | 0 |
| 1 | 155946851 | 156007070 | ARHGEF2 | 2 | 0 |
| 6 | 156776020 | 157210779 | ARID1B | 1 | 0 |
| 12 | 45729706 | 45908040 | ARID2 | 1 | 1 |
| 15 | 80404350 | 80597933 | ARNT2 | 1 | 0 |
| 2 | 9206765 | 9405683 | ASAP2 | 2 | 0 |
| 3 | 57268342 | 57292685 | ASB14 | 2 | 0 |
| 1 | 155335268 | 155563162 | ASH1L | 2 | 0 |
| 1 | 197084121 | 197146694 | ASPM | 2 | 0 |
| 9 | 116423112 | 117415070 | ASTN2 | 2 | 0 |
| 18 | 33578219 | 33751195 | ASXL3 | 2 | 0 |
| 15 | 25677273 | 25865184 | ATP10A | 2 | 0 |
| 1 | 116372668 | 116410261 | ATP1A1 | 2 | 0 |
| 19 | 41966582 | 41997497 | ATP1A3 |  | 1 |
| 12 | 89588049 | 89709366 | ATP2B1 | 3 | 0 |
| 3 | 10324023 | 10708007 | ATP2B2 | 2 | 0 |
| 12 | 123712353 | 123761755 | ATP6V0A2 | 2 | 0 |
| 7 | 69598296 | 70793506 | AUTS2 | 1 | 1 |
| 12 | 63142759 | 63151201 | AVPR1A | 3 | 0 |
| 1 | 206106936 | 206117699 | AVPR1B | 1 | 0 |
| 7 | 99966720 | 99976042 | AZGP1 | 1 | 1 |
| 11 | 117285232 | 117316259 | BACE1 | 2 | 1 |
| 7 | 98291650 | 98401090 | BAIAP2L1 | 2 | 0 |
| 2 | 159318979 | 159616569 | BAZ2B | 2 | 0 |
| 15 | 72686179 | 72738475 | BBS4 | 1 | 1 |
| 20 | 53936777 | 54070594 | BCAS1 | 2 | 0 |
| 16 | 31106107 | 31112791 | BCKDK | 3 | 0 |
| 2 | 60450520 | 60554467 | BCL11A |  | 1 |
| 12 | 119989236 | 120094494 | BICDL1 | 2 | 0 |
| 19 | 47608196 | 47703277 | BICRA | 2 | 0 |
| 2 | 32357023 | 32619571 | BIRC6 | 2 | 0 |
| 7 | 140719327 | 140924929 | BRAF | 2 | 0 |
| 13 | 32315086 | 32400268 | BRCA2 | 3 | 0 |
| 19 | 15235519 | 15332545 | BRD4 | 2 | 0 |
| 1 | 190097658 | 190478404 | BRINP3 | 1 | 0 |
| 11 | 1389899 | 1462689 | BRSK2 |  | 1 |
| 4 | 15703065 | 15738313 | BST1 | 2 | 0 |
| 10 | 91923770 | 92031437 | BTAF1 | 1 | 1 |
| 10 | 101354033 | 101557321 | BTRC | 2 | 0 |
| 12 | 6942978 | 6946003 | C12orf57 | 1 | 1 |
| 15 | 40769980 | 40772449 | C15orf62 |  | 1 |
| 1 | 8945867 | 8975092 | CA6 |  | 1 |
| 19 | 13206442 | 13633025 | CACNA1A | 3 | 1 |
| 9 | 137877782 | 138124624 | CACNA1B | 1 | 1 |
| 12 | 1970772 | 2697950 | CACNA1C | 1 | 0 |
| 3 | 53328963 | 53813733 | CACNA1D | 2 | 0 |
| 1 | 181317690 | 181813262 | CACNA1E | 2 | 0 |
| 17 | 50560715 | 50627474 | CACNA1G | 1 | 0 |
| 16 | 1153106 | 1221771 | CACNA1H | 2 | 0 |
| 22 | 39570753 | 39689735 | CACNA1I | 2 | 0 |
| 7 | 81946444 | 82443956 | CACNA2D1 | 2 | 0 |
| 3 | 54122552 | 55074557 | CACNA2D3 | 1 | 0 |
| 17 | 39173453 | 39197702 | CACNB1 | 2 | 0 |
| 10 | 18140424 | 18543557 | CACNB2 | 2 | 0 |
| 22 | 36560857 | 36703752 | CACNG2 | 2 | 0 |
| 11 | 115169218 | 115504957 | CADM1 | 2 | 0 |
| 3 | 84958989 | 86074429 | CADM2 | 2 | 0 |
| 3 | 62398346 | 62875416 | CADPS | 2 | 0 |
| 7 | 122318411 | 122886759 | CADPS2 |  | 1 |
| 5 | 150219491 | 150290093 | CAMK2A |  | 1 |
| 7 | 44210019 | 44334577 | CAMK2B | 2 | 0 |
| 5 | 111223653 | 111494886 | CAMK4 | 2 | 0 |
| 17 | 4967992 | 4987675 | CAMTA2 |  | 1 |
| 19 | 38730187 | 38769904 | CAPN12 | 2 | 0 |
| 11 | 34051731 | 34102610 | CAPRIN1 | 2 | 0 |
| 7 | 2906142 | 3044228 | CARD11 | 2 | 0 |
| 16 | 2177180 | 2196605 | CASKIN1 | 2 | 0 |
| 1 | 10636604 | 10796650 | CASZ1 | 1 | 1 |
| 11 | 34438934 | 34472060 | CAT | 2 | 0 |
| 17 | 48070052 | 48101478 | CBX1 | 2 | 0 |
| 19 | 13906201 | 13930879 | CC2D1A | 3 | 0 |
| 14 | 91271323 | 91417844 | CCDC88C | 2 | 0 |
| 12 | 28133249 | 28581511 | CCDC91 | 2 | 0 |
| 9 | 36169388 | 36171334 | CCIN |  | 1 |
| 5 | 163437569 | 163446151 | CCNG1 | 2 | 0 |
| 14 | 99481169 | 99535044 | CCNK | 1 | 1 |
| 4 | 90127394 | 91605295 | CCSER1 | 2 | 0 |
| 2 | 61868085 | 61888671 | CCT4 |  | 1 |
| 15 | 73683966 | 73714514 | CD276 | 1 | 0 |
| 4 | 15778275 | 15853232 | CD38 | 2 | 0 |
| 14 | 102932380 | 103057549 | CDC42BPB | 2 | 0 |
| 5 | 24487100 | 24644978 | CDH10 | 1 | 1 |
| 16 | 64943753 | 65126112 | CDH11 | 2 | 0 |
| 16 | 82626965 | 83800640 | CDH13 | 1 | 0 |
| 18 | 27932879 | 28177946 | CDH2 | 1 | 1 |
| 20 | 46173739 | 46308498 | CDH22 | 3 | 1 |
| 16 | 61647242 | 62037035 | CDH8 | 2 | 0 |
| 5 | 26880597 | 27121150 | CDH9 | 2 | 0 |
| 7 | 39950121 | 40099580 | CDK13 | 2 | 1 |
| 6 | 110609978 | 110815958 | CDK19 | 2 | 0 |
| 9 | 120388875 | 120580170 | CDK5RAP2 | 1 | 0 |
| 13 | 26254104 | 26420982 | CDK8 | 2 | 0 |
| 11 | 125955796 | 126063335 | CDON | 2 | 0 |
| 22 | 17359949 | 17558151 | CECR2 | 2 | 0 |
| 10 | 10798397 | 11336675 | CELF2 | 2 | 0 |
| 18 | 37243040 | 37565827 | CELF4 | 1 | 1 |
| 15 | 72284727 | 72320157 | CELF6 |  | 1 |
| 4 | 55948871 | 56033361 | CEP135 | 2 | 0 |
| 12 | 88049016 | 88142099 | CEP290 | 2 | 0 |
| 7 | 130393771 | 130442433 | CEP41 | 2 | 0 |
| 5 | 75356345 | 75512138 | CERT1 | 2 | 0 |
| 15 | 57375967 | 57550717 | CGNL1 | 2 | 0 |
| 13 | 114314482 | 114337626 | CHAMP1 | 2 | 0 |
| 5 | 98853985 | 98929007 | CHD1 | 2 | 0 |
| 15 | 92886203 | 93027996 | CHD2 | 2 | 0 |
| 17 | 7884796 | 7912760 | CHD3 | 2 | 0 |
| 8 | 60678740 | 60868028 | CHD7 | 2 | 0 |
| 14 | 21385194 | 21456126 | CHD8 | 2 | 0 |
| 16 | 53054991 | 53329150 | CHD9 | 2 | 0 |
| 22 | 50578959 | 50601455 | CHKB | 2 | 0 |
| 16 | 89640816 | 89657738 | CHMP1A | 3 | 0 |
| 1 | 239386565 | 239915452 | CHRM3 | 1 | 0 |
| 15 | 31923438 | 32173018 | CHRNA7 | 1 | 0 |
| 8 | 42697366 | 42737407 | CHRNB3 | 1 | 1 |
| 3 | 143119771 | 143124014 | CHST2 | 1 | 0 |
| 15 | 78104606 | 78131535 | CIB2 | 2 | 0 |
| 19 | 42268537 | 42295797 | CIC | 2 | 0 |
| 2 | 121337776 | 121649476 | CLASP1 | 2 | 0 |
| 7 | 74289407 | 74405935 | CLIP2 | 2 | 0 |
| 8 | 1755778 | 1801711 | CLN8 | 2 | 0 |
| 22 | 19179473 | 19291719 | CLTCL1 | 2 | 0 |
| 16 | 81444808 | 81711762 | CMIP | 1 | 1 |
| 2 | 6840570 | 6866635 | CMPK2 | 2 | 0 |
| 8 | 86553977 | 86743675 | CNGB3 | 2 | 0 |
| 16 | 58519951 | 58629885 | CNOT1 | 3 | 1 |
| 19 | 54137749 | 54155681 | CNOT3 | 1 | 1 |
| 6 | 88139864 | 88166347 | CNR1 | 2 | 0 |
| 3 | 74262568 | 74614659 | CNTN3 | 2 | 0 |
| 3 | 2098813 | 3057959 | CNTN4 | 2 | 0 |
| 11 | 99020949 | 100358885 | CNTN5 | 2 | 0 |
| 3 | 1092658 | 1404217 | CNTN6 | 2 | 0 |
| 7 | 146116002 | 148420998 | CNTNAP2 | 2 | 0 |
| 9 | 39064710 | 39288315 | CNTNAP3 | 3 | 0 |
| 16 | 76277278 | 76560757 | CNTNAP4 | 2 | 0 |
| 2 | 124025287 | 124921219 | CNTNAP5 | 2 | 0 |
| 7 | 7356203 | 7535873 | COL28A1 | 2 | 0 |
| 16 | 30182827 | 30189076 | CORO1A | 2 | 0 |
| 5 | 173888349 | 173961980 | CPEB4 | 3 | 0 |
| 11 | 61402641 | 61430031 | CPSF7 | 1 | 1 |
| 1 | 53196792 | 53214197 | CPT2 | 2 | 0 |
| 4 | 8592660 | 8619759 | CPZ | 2 | 0 |
| 16 | 3725054 | 3880713 | CREBBP | 2 | 0 |
| 1 | 114716913 | 114758676 | CSDE1 |  | 1 |
| 8 | 2935353 | 4994972 | CSMD1 | 2 | 0 |
| 8 | 112222928 | 113436939 | CSMD3 | 2 | 0 |
| 15 | 64165525 | 64356173 | CSNK1G1 | 2 | 0 |
| 20 | 472498 | 543835 | CSNK2A1 | 2 | 0 |
| 6 | 31665227 | 31670343 | CSNK2B | 2 | 0 |
| 16 | 67562467 | 67639177 | CTCF | 2 | 0 |
| 2 | 79185231 | 80648861 | CTNNA2 | 2 | 0 |
| 10 | 65912457 | 67763637 | CTNNA3 | 1 | 0 |
| 3 | 41194741 | 41260096 | CTNNB1 |  | 1 |
| 5 | 10971836 | 11904446 | CTNND2 | 3 | 1 |
| 11 | 10751246 | 10801625 | CTR9 |  | 1 |
| 7 | 117710651 | 117874139 | CTTNBP2 | 1 | 1 |
| 2 | 224470150 | 224585397 | CUL3 | 2 | 0 |
| 6 | 43037617 | 43053943 | CUL7 | 1 | 1 |
| 7 | 101815904 | 102283958 | CUX1 | 2 | 1 |
| 12 | 111034165 | 111350554 | CUX2 | 2 | 0 |
| 3 | 39263495 | 39281735 | CX3CR1 | 2 | 1 |
| 15 | 22867052 | 22981063 | CYFIP1 | 1 | 1 |
| 9 | 102995311 | 103018488 | CYLC2 | 2 | 0 |
| 8 | 142872356 | 142879846 | CYP11B1 | 1 | 0 |
| 2 | 218781749 | 218815293 | CYP27A1 | 3 | 0 |
| 11 | 61680391 | 61747001 | DAGLA | 2 | 1 |
| 4 | 99816827 | 99870190 | DAPP1 |  | 1 |
| 18 | 52340197 | 53535899 | DCC |  | 1 |
| 7 | 50458436 | 50565405 | DDC | 2 | 0 |
| 8 | 38225218 | 38275558 | DDHD2 | 2 | 0 |
| 12 | 48829756 | 48852842 | DDX23 |  | 1 |
| 11 | 644233 | 707118 | DEAF1 | 1 | 1 |
| 12 | 122752824 | 122771064 | DENR | 2 | 0 |
| 22 | 31753867 | 31908033 | DEPDC5 | 2 | 0 |
| 7 | 137381037 | 137847092 | DGKI | 2 | 0 |
| 11 | 71428193 | 71452868 | DHCR7 | 2 | 0 |
| 3 | 47802909 | 47850195 | DHX30 | 2 | 0 |
| 1 | 182839347 | 182887982 | DHX9 | 2 | 0 |
| 21 | 46458891 | 46570015 | DIP2A | 2 | 0 |
| 10 | 274201 | 689668 | DIP2C | 2 | 0 |
| 3 | 143971823 | 144048719 | DIPK2A | 3 | 0 |
| 1 | 231626790 | 232041272 | DISC1 | 2 | 1 |
| 11 | 111927144 | 112022653 | DIXDC1 | 2 | 0 |
| 3 | 197042560 | 197299330 | DLG1 | 1 | 0 |
| 11 | 83455012 | 85628335 | DLG2 | 2 | 0 |
| 17 | 7187187 | 7219841 | DLG4 | 3 | 0 |
| 18 | 3496032 | 4455307 | DLGAP1 | 1 | 1 |
| 8 | 737628 | 1708476 | DLGAP2 |  | 1 |
| 1 | 34865436 | 34929650 | DLGAP3 | 1 | 0 |
| 6 | 170282206 | 170306565 | DLL1 | 2 | 0 |
| 2 | 172099438 | 172102900 | DLX2 | 1 | 0 |
| 17 | 49990005 | 49995224 | DLX3 | 3 | 0 |
| 7 | 97005553 | 97011040 | DLX6 | 3 | 0 |
| 19 | 45769709 | 45782552 | DMPK | 1 | 0 |
| 19 | 45782947 | 45792845 | DMWD |  | 1 |
| 15 | 51447711 | 51622833 | DMXL2 | 2 | 0 |
| 12 | 123762188 | 123935720 | DNAH10 | 2 | 1 |
| 17 | 78423697 | 78577396 | DNAH17 | 1 | 0 |
| 16 | 20933111 | 21159441 | DNAH3 | 2 | 0 |
| 2 | 229357629 | 229714555 | DNER | 2 | 0 |
| 2 | 25227855 | 25342590 | DNMT3A | 2 | 0 |
| 10 | 126905409 | 127452517 | DOCK1 | 2 | 0 |
| 7 | 111726110 | 112206407 | DOCK4 | 2 | 1 |
| 9 | 214854 | 465259 | DOCK8 | 1 | 1 |
| 9 | 128945530 | 128947603 | DOLK | 1 | 0 |
| 2 | 114442299 | 115845780 | DPP10 | 2 | 0 |
| 11 | 66480013 | 66509657 | DPP3 | 2 | 0 |
| 2 | 161992245 | 162074394 | DPP4 | 1 | 1 |
| 7 | 153748133 | 154894285 | DPP6 | 2 | 0 |
| 1 | 97077743 | 97995000 | DPYD |  | 1 |
| 8 | 26514031 | 26658178 | DPYSL2 | 2 | 0 |
| 5 | 147390808 | 147510068 | DPYSL3 | 1 | 0 |
| 5 | 175440036 | 175444182 | DRD1 | 2 | 0 |
| 11 | 113409605 | 113475691 | DRD2 |  | 1 |
| 3 | 114127580 | 114199407 | DRD3 | 2 | 1 |
| 21 | 40010999 | 40847158 | DSCAM | 3 | 0 |
| 6 | 56457987 | 56954830 | DST |  | 1 |
| 20 | 31847637 | 31870664 | DUSP15 |  | 1 |
| 3 | 184155377 | 184173614 | DVL3 | 3 | 0 |
| 10 | 80336105 | 80356755 | DYDC1 | 1 | 0 |
| 10 | 80344745 | 80368073 | DYDC2 | 2 | 1 |
| 14 | 101964573 | 102056443 | DYNC1H1 | 1 | 0 |
| 21 | 37365573 | 37526358 | DYRK1A | 2 | 0 |
| 10 | 129835233 | 129973053 | EBF3 | 2 | 0 |
| 9 | 111360685 | 111484745 | ECPAS | 2 | 0 |
| 20 | 63488013 | 63499239 | EEF1A2 | 2 | 0 |
| 8 | 131904093 | 132013642 | EFR3A | 2 | 0 |
| 8 | 22687659 | 22693480 | EGR3 | 3 | 0 |
| 9 | 137618992 | 137870016 | EHMT1 | 2 | 0 |
| 19 | 10115014 | 10119918 | EIF3G | 1 | 1 |
| 4 | 98879276 | 98929133 | EIF4E | 2 | 0 |
| 3 | 184314495 | 184335358 | EIF4G1 | 2 | 0 |
| 9 | 23690104 | 23826337 | ELAVL2 | 2 | 0 |
| 19 | 11451326 | 11481046 | ELAVL3 | 2 | 0 |
| 6 | 10980759 | 11044305 | ELOVL2 | 2 | 0 |
| 18 | 36129444 | 36180557 | ELP2 | 2 | 1 |
| 11 | 31509755 | 31790324 | ELP4 | 1 | 1 |
| 11 | 76444923 | 76553031 | EMSY |  | 1 |
| 7 | 155458129 | 155464831 | EN2 | 2 | 0 |
| 6 | 131808016 | 131895155 | ENPP1 | 2 | 1 |
| 22 | 41092592 | 41180077 | EP300 | 2 | 0 |
| 12 | 131949942 | 132080460 | EP400 | 1 | 0 |
| 2 | 148644440 | 148787569 | EPC2 | 2 | 0 |
| 7 | 143390289 | 143408856 | EPHA1 | 2 | 0 |
| 3 | 134795260 | 135260467 | EPHB1 |  | 1 |
| 1 | 22710839 | 22921500 | EPHB2 | 2 | 0 |
| 8 | 143857324 | 143878467 | EPPK1 | 2 | 0 |
| 5 | 65883128 | 66082546 | ERBIN | 2 | 0 |
| 21 | 38380027 | 38661780 | ERG | 2 | 0 |
| 2 | 157318631 | 157327713 | ERMN | 2 | 0 |
| 14 | 64084232 | 64338112 | ESR2 | 3 | 1 |
| 14 | 76310712 | 76501837 | ESRRB | 2 | 0 |
| 19 | 51345169 | 51366388 | ETFB | 1 | 1 |
| 5 | 443175 | 471937 | EXOC3 | 2 | 0 |
| 14 | 57200507 | 57268905 | EXOC5 | 2 | 0 |
| 10 | 92826831 | 93059493 | EXOC6 | 2 | 0 |
| 2 | 72175984 | 72826041 | EXOC6B | 2 | 1 |
| 8 | 117794490 | 118111826 | EXT1 | 2 | 0 |
| 8 | 81478419 | 81483236 | FABP4 | 3 | 0 |
| 8 | 81280536 | 81284777 | FABP5 | 2 | 0 |
| 19 | 38403093 | 38409088 | FAM98C | 1 | 1 |
| 15 | 30890559 | 30943108 | FAN1 | 2 | 0 |
| 4 | 186587794 | 186726722 | FAT1 | 2 | 0 |
| 15 | 48408313 | 48645721 | FBN1 | 2 | 0 |
| 12 | 132489551 | 132585188 | FBRSL1 | 1 | 0 |
| 7 | 102811189 | 103074839 | FBXL13 | 2 | 0 |
| 2 | 47789316 | 47906498 | FBXO11 | 2 | 0 |
| 14 | 39397684 | 39432466 | FBXO33 | 2 | 0 |
| 3 | 121593379 | 121630295 | FBXO40 | 2 | 0 |
| 1 | 159800511 | 159816257 | FCRL6 | 2 | 0 |
| 3 | 62369681 | 62374324 | FEZF2 | 2 | 0 |
| 4 | 154583126 | 154590742 | FGA |  | 1 |
| 13 | 101710804 | 102402457 | FGF14 | 2 | 0 |
| 8 | 38400215 | 38468834 | FGFR1 | 2 | 1 |
| 3 | 59747277 | 61251459 | FHIT | 2 | 0 |
| 14 | 28764329 | 28770277 | FOXG1 | 2 | 0 |
| 3 | 70954693 | 71583978 | FOXP1 | 2 | 0 |
| 7 | 114086327 | 114693772 | FOXP2 | 1 | 0 |
| 4 | 189940870 | 189963202 | FRG1 | 2 | 0 |
| 6 | 115931149 | 116060891 | FRK | 2 | 0 |
| 9 | 69035751 | 69079076 | FXN | 2 | 0 |
| 4 | 75641849 | 75724589 | G3BP2 | 2 | 0 |
| 9 | 98288109 | 98708935 | GABBR2 | 2 | 0 |
| 4 | 46918900 | 46993581 | GABRA4 | 2 | 0 |
| 5 | 161288429 | 161549044 | GABRB2 | 2 | 0 |
| 15 | 26543552 | 26939539 | GABRB3 | 2 | 0 |
| 5 | 162000057 | 162162977 | GABRG2 | 2 | 0 |
| 15 | 26971181 | 27541984 | GABRG3 | 1 | 0 |
| 5 | 154190730 | 154420984 | GALNT10 | 2 | 0 |
| 2 | 153871922 | 154453979 | GALNT13 | 2 | 0 |
| 2 | 30910467 | 31155202 | GALNT14 | 1 | 0 |
| 1 | 230057990 | 230282122 | GALNT2 | 2 | 0 |
| 12 | 4720400 | 4851927 | GALNT8 | 3 | 1 |
| 11 | 22625509 | 22813001 | GAS2 | 2 | 0 |
| 15 | 45361124 | 45402327 | GATM | 2 | 1 |
| 3 | 81489703 | 81761645 | GBE1 | 2 | 0 |
| 9 | 72114595 | 72257193 | GDA | 2 | 0 |
| 17 | 44903159 | 44916937 | GFAP | 1 | 1 |
| 17 | 36544912 | 36589848 | GGNBP2 | 3 | 0 |
| 7 | 100679507 | 100694250 | GIGYF1 | 2 | 0 |
| 2 | 232697299 | 232860605 | GIGYF2 | 3 | 0 |
| 1 | 53506237 | 53739164 | GLIS1 | 2 | 0 |
| 6 | 38675925 | 38703145 | GLO1 | 2 | 0 |
| 7 | 79768028 | 80226181 | GNAI1 | 3 | 0 |
| 20 | 58839718 | 58911192 | GNAS | 2 | 0 |
| 22 | 19783223 | 19854939 | GNB1L | 3 | 0 |
| 7 | 100673567 | 100679174 | GNB2 | 2 | 0 |
| 13 | 91398621 | 92873682 | GPC5 | 2 | 0 |
| 13 | 93226807 | 94408020 | GPC6 | 2 | 0 |
| 2 | 156435290 | 156613735 | GPD2 | 2 | 1 |
| 14 | 66507407 | 67181803 | GPHN | 2 | 0 |
| 7 | 124743885 | 124765792 | GPR37 | 1 | 1 |
| 7 | 113078331 | 113087778 | GPR85 | 3 | 0 |
| 7 | 50590063 | 50793462 | GRB10 | 1 | 1 |
| 5 | 153489615 | 153813869 | GRIA1 | 2 | 0 |
| 4 | 157204182 | 157387146 | GRIA2 | 2 | 0 |
| 10 | 85599552 | 86366795 | GRID1 | 2 | 0 |
| 4 | 92303966 | 93810157 | GRID2 | 1 | 1 |
| 7 | 6496778 | 6551461 | GRID2IP | 1 | 1 |
| 6 | 100962701 | 102081622 | GRIK2 | 2 | 0 |
| 1 | 36795527 | 37034515 | GRIK3 | 3 | 0 |
| 11 | 120511746 | 120988906 | GRIK4 | 3 | 0 |
| 19 | 41998321 | 42070206 | GRIK5 | 2 | 1 |
| 9 | 137138346 | 137168756 | GRIN1 | 2 | 0 |
| 16 | 9753404 | 10182928 | GRIN2A | 1 | 0 |
| 12 | 13437942 | 13982002 | GRIN2B | 3 | 0 |
| 12 | 66347431 | 67069162 | GRIP1 | 2 | 0 |
| 4 | 2963571 | 3040760 | GRK4 | 2 | 0 |
| 11 | 88504576 | 89065982 | GRM5 | 2 | 0 |
| 3 | 6770001 | 7741533 | GRM7 | 2 | 0 |
| 1 | 109687814 | 109709039 | GSTM1 | 2 | 0 |
| 7 | 74650231 | 74760692 | GTF2I | 1 | 0 |
| 11 | 106674019 | 107018476 | GUCY1A2 | 2 | 0 |
| 6 | 27125897 | 27132795 | H2BC11 | 2 | 0 |
| 6 | 27824092 | 27824480 | H4C11 | 2 | 1 |
| 6 | 26204610 | 26205021 | H4C5 | 2 | 0 |
| 6 | 104728094 | 104859919 | HACE1 | 1 | 0 |
| 5 | 45254948 | 45696498 | HCN1 | 2 | 0 |
| 2 | 239048168 | 239401654 | HDAC4 | 1 | 1 |
| 2 | 241227264 | 241317061 | HDLBP | 1 | 0 |
| 12 | 112160188 | 112382439 | HECTD4 | 2 | 0 |
| 2 | 196189099 | 196593684 | HECW2 | 1 | 1 |
| 11 | 124919205 | 124936412 | HEPACAM | 2 | 0 |
| 15 | 63608618 | 63833948 | HERC1 | 3 | 0 |
| 15 | 28111040 | 28322179 | HERC2 | 2 | 0 |
| 6 | 142751469 | 142956698 | HIVEP2 | 2 | 0 |
| 1 | 41506365 | 42035925 | HIVEP3 |  | 1 |
| 6 | 29941260 | 29949572 | HLA-A | 2 | 0 |
| 6 | 31353872 | 31367067 | HLA-B | 2 | 0 |
| 6 | 33075990 | 33089696 | HLA-DPB1 | 3 | 0 |
| 6 | 32577902 | 32589848 | HLA-DRB1 | 2 | 0 |
| 6 | 29826967 | 29831125 | HLA-G | 2 | 0 |
| 21 | 39342315 | 39349647 | HMGN1 | 2 | 0 |
| 4 | 82352498 | 82374503 | HNRNPD | 1 | 1 |
| 10 | 43385617 | 43409186 | HNRNPF | 2 | 0 |
| 9 | 83968083 | 83980631 | HNRNPK | 2 | 0 |
| 1 | 23303771 | 23344336 | HNRNPR |  | 1 |
| 1 | 244840638 | 244864560 | HNRNPU | 2 | 0 |
| 11 | 62712630 | 62727457 | HNRNPUL2 | 2 | 0 |
| 5 | 79372636 | 79514134 | HOMER1 | 2 | 0 |
| 7 | 27092993 | 27096000 | HOXA1 | 2 | 0 |
| 11 | 532242 | 537321 | HRAS | 2 | 0 |
| 6 | 114055596 | 114343023 | HS3ST5 | 1 | 1 |
| 1 | 209686178 | 209734949 | HSD11B1 | 3 | 1 |
| 6 | 77460924 | 77463491 | HTR1B | 2 | 0 |
| 11 | 113975075 | 113990313 | HTR3A | 2 | 0 |
| 3 | 184053047 | 184060673 | HTR3C | 2 | 0 |
| 16 | 70802084 | 71230722 | HYDIN | 2 | 0 |
| 7 | 8113184 | 8262687 | ICA1 | 2 | 0 |
| 12 | 102395874 | 102481744 | IGF1 | 2 | 0 |
| 7 | 50304068 | 50405101 | IKZF1 |  | 1 |
| 2 | 101991960 | 102028544 | IL1R2 | 2 | 0 |
| 1 | 153661788 | 153671028 | ILF2 | 2 | 0 |
| 7 | 110662644 | 111562517 | IMMP2L | 2 | 0 |
| 2 | 190343570 | 190371665 | INPP1 | 2 | 0 |
| 7 | 1470277 | 1504389 | INTS1 | 2 | 0 |
| 13 | 51354077 | 51454264 | INTS6 | 1 | 0 |
| 1 | 156525405 | 156572604 | IQGAP3 | 2 | 0 |
| 14 | 77024543 | 77028708 | IRF2BPL | 2 | 0 |
| 10 | 15513954 | 15719922 | ITGA8 | 1 | 0 |
| 17 | 47253827 | 47313743 | ITGB3 | 3 | 0 |
| 3 | 4493345 | 4847506 | ITPR1 | 2 | 0 |
| 21 | 33642400 | 33899861 | ITSN1 | 2 | 0 |
| 6 | 15246069 | 15522042 | JARID2 | 2 | 0 |
| 10 | 63167221 | 63521850 | JMJD1C |  | 1 |
| 9 | 470291 | 746105 | KANK1 |  | 1 |
| 17 | 46029916 | 46225389 | KANSL1 | 2 | 0 |
| 3 | 20040446 | 20154404 | KAT2B | 2 | 0 |
| 8 | 41929479 | 42051994 | KAT6A | 1 | 0 |
| 10 | 74824927 | 75032624 | KAT6B | 1 | 0 |
| 13 | 30202630 | 30307551 | KATNAL1 | 1 | 0 |
| 18 | 46917492 | 47103478 | KATNAL2 | 2 | 0 |
| 1 | 110519837 | 110631474 | KCNA2 | 2 | 0 |
| 20 | 49293394 | 49484297 | KCNB1 | 1 | 1 |
| 11 | 17734774 | 17856804 | KCNC1 | 2 | 1 |
| 12 | 75040077 | 75209839 | KCNC2 | 2 | 0 |
| 7 | 120273175 | 120750337 | KCND2 | 2 | 0 |
| 1 | 111770662 | 111989668 | KCND3 | 2 | 0 |
| 14 | 62699464 | 63102037 | KCNH5 | 1 | 1 |
| 1 | 159998651 | 160070160 | KCNJ10 |  | 1 |
| 21 | 38155549 | 38307357 | KCNJ15 | 2 | 0 |
| 11 | 65592836 | 65595996 | KCNK7 | 2 | 0 |
| 10 | 76869601 | 77638369 | KCNMA1 | 2 | 0 |
| 20 | 63400208 | 63472677 | KCNQ2 |  | 1 |
| 8 | 132120861 | 132481095 | KCNQ3 | 2 | 0 |
| 2 | 17877847 | 18361616 | KCNS3 | 2 | 0 |
| 16 | 29905012 | 29926236 | KCTD13 | 2 | 0 |
| 6 | 18155329 | 18223854 | KDM1B | 2 | 0 |
| 11 | 67119263 | 67258082 | KDM2A | 2 | 1 |
| 12 | 121429096 | 121581023 | KDM2B | 3 | 0 |
| 2 | 86440647 | 86492716 | KDM3A | 1 | 1 |
| 5 | 138352685 | 138437028 | KDM3B | 3 | 0 |
| 19 | 4969113 | 5153598 | KDM4B | 2 | 0 |
| 9 | 6720863 | 7175648 | KDM4C | 2 | 0 |
| 12 | 280057 | 389320 | KDM5A | 2 | 0 |
| 1 | 202724495 | 202808487 | KDM5B | 1 | 1 |
| 17 | 7834217 | 7854796 | KDM6B | 3 | 0 |
| 6 | 61679961 | 62286225 | KHDRBS2 | 1 | 1 |
| 4 | 6781375 | 6884170 | KIAA0232 | 1 | 1 |
| 6 | 57046532 | 57055239 | KIAA1586 | 3 | 0 |
| 8 | 29067278 | 29263124 | KIF13B | 2 | 0 |
| 1 | 200551497 | 200620751 | KIF14 | 3 | 0 |
| 2 | 240713761 | 240824293 | KIF1A | 2 | 0 |
| 2 | 148875227 | 149026759 | KIF5C | 1 | 0 |
| 11 | 126423358 | 127003460 | KIRREL3 | 1 | 1 |
| 20 | 21125983 | 21246622 | KIZ | 2 | 0 |
| 19 | 1852399 | 1863579 | KLF16 | 2 | 0 |
| 2 | 207074137 | 207173856 | KLF7 | 2 | 1 |
| 1 | 173714941 | 173786692 | KLHL20 | 2 | 0 |
| 11 | 118436456 | 118526832 | KMT2A | 2 | 0 |
| 7 | 152134922 | 152436644 | KMT2C | 2 | 0 |
| 7 | 104940943 | 105115019 | KMT2E | 2 | 0 |
| 11 | 68154863 | 68213852 | KMT5B | 2 | 0 |
| 3 | 186717348 | 186744410 | KNG1 | 2 | 0 |
| 19 | 47475150 | 47484265 | KPTN |  | 1 |
| 12 | 75490863 | 75511636 | KRR1 | 2 | 0 |
| 17 | 40766238 | 40772201 | KRT26 | 2 | 0 |
| 18 | 6941742 | 7117797 | LAMA1 | 2 | 0 |
| 7 | 107923799 | 108003213 | LAMB1 | 1 | 1 |
| 10 | 102106489 | 102120368 | LDB1 | 2 | 0 |
| 19 | 11089418 | 11133820 | LDLR | 2 | 0 |
| 12 | 65169583 | 65248355 | LEMD3 | 2 | 0 |
| 15 | 51938025 | 51971778 | LEO1 |  | 1 |
| 7 | 128241278 | 128257629 | LEP | 3 | 0 |
| 9 | 124001670 | 124033301 | LHX2 | 2 | 0 |
| 19 | 54273812 | 54281184 | LILRB2 | 2 | 0 |
| 19 | 49114324 | 49118460 | LIN7B | 2 | 0 |
| 19 | 48485271 | 48513935 | LMTK3 | 2 | 0 |
| 9 | 126613928 | 126701032 | LMX1B | 2 | 0 |
| 2 | 175923882 | 176002839 | LNPK |  | 1 |
| 4 | 150264435 | 151015727 | LRBA | 2 | 0 |
| 6 | 40391591 | 40587364 | LRFN2 | 2 | 0 |
| 14 | 41606876 | 41904549 | LRFN5 |  | 1 |
| 12 | 57128483 | 57213361 | LRP1 | 2 | 1 |
| 2 | 169127109 | 169362534 | LRP2 | 1 | 0 |
| 6 | 53794497 | 53924125 | LRRC1 | 2 | 0 |
| 11 | 40114203 | 41459773 | LRRC4C | 2 | 0 |
| 22 | 20982269 | 20999032 | LZTR1 | 2 | 0 |
| 10 | 100996618 | 101007836 | LZTS2 | 1 | 1 |
| 1 | 39081316 | 39487177 | MACF1 |  | 1 |
| 20 | 13995369 | 16053197 | MACROD2 |  | 1 |
| 15 | 23643549 | 23647867 | MAGEL2 | 2 | 1 |
| 15 | 43510958 | 43531620 | MAP1A | 2 | 0 |
| 5 | 72107234 | 72209565 | MAP1B | 1 | 0 |
| 19 | 38587641 | 38618882 | MAP4K1 | 3 | 0 |
| 2 | 101696850 | 101894690 | MAP4K4 | 3 | 0 |
| 16 | 30114105 | 30123506 | MAPK3 | 2 | 0 |
| 11 | 45885651 | 45906465 | MAPK8IP1 | 1 | 0 |
| 17 | 45894527 | 46028334 | MAPT | 1 | 1 |
| 1 | 220528136 | 220664461 | MARK1 |  | 1 |
| 11 | 63838928 | 63911020 | MARK2 | 2 | 0 |
| 19 | 18097778 | 18151692 | MAST3 | 2 | 0 |
| 18 | 50266882 | 50281774 | MBD1 | 1 | 0 |
| 19 | 1573596 | 1592865 | MBD3 | 3 | 0 |
| 3 | 129430947 | 129440179 | MBD4 | 2 | 0 |
| 2 | 148021011 | 148516971 | MBD5 | 1 | 1 |
| 12 | 57520710 | 57530148 | MBD6 | 2 | 0 |
| 19 | 54173412 | 54189882 | MBOAT7 |  | 1 |
| 8 | 47960185 | 47978160 | MCM4 | 2 | 0 |
| 2 | 135839626 | 135876443 | MCM6 | 2 | 0 |
| 8 | 6406592 | 6648508 | MCPH1 | 3 | 0 |
| 14 | 46840092 | 47675605 | MDGA2 | 3 | 0 |
| 3 | 151085286 | 151437072 | MED12L | 2 | 0 |
| 17 | 61942605 | 62065278 | MED13 | 2 | 0 |
| 12 | 115957905 | 116277693 | MED13L | 2 | 0 |
| 6 | 131573966 | 131628242 | MED23 | 2 | 0 |
| 5 | 88717117 | 88904257 | MEF2C | 2 | 0 |
| 5 | 127290796 | 127465737 | MEGF10 | 2 | 0 |
| 15 | 65895079 | 66253756 | MEGF11 | 2 | 1 |
| 15 | 36889204 | 37101299 | MEIS2 | 1 | 1 |
| 2 | 31865060 | 32011230 | MEMO1 | 1 | 0 |
| 16 | 634427 | 636366 | METTL26 | 2 | 0 |
| 11 | 119338942 | 119346705 | MFRP | 3 | 1 |
| 18 | 21704957 | 21870953 | MIB1 | 1 | 1 |
| 17 | 4833340 | 4898061 | MINK1 | 2 | 0 |
| 10 | 27672874 | 27746060 | MKX | 2 | 0 |
| 9 | 5890889 | 5910606 | MLANA | 1 | 0 |
| 17 | 2384073 | 2401104 | MNT | 2 | 0 |
| 16 | 14071319 | 14266773 | MRTFB | 2 | 0 |
| 11 | 124766498 | 124800706 | MSANTD2 | 2 | 0 |
| 3 | 136148917 | 136197241 | MSL2 | 2 | 0 |
| 8 | 16107878 | 16567490 | MSR1 | 1 | 0 |
| 8 | 10054292 | 10428891 | MSRA | 2 | 0 |
| 5 | 174724582 | 174730896 | MSX2 | 2 | 0 |
| 1 | 37809574 | 37859592 | MTF1 | 2 | 0 |
| 1 | 11785723 | 11806455 | MTHFR | 1 | 0 |
| 1 | 11106535 | 11262556 | MTOR | 3 | 0 |
| 16 | 70661204 | 70686053 | MTSS2 |  | 1 |
| 7 | 100969565 | 101018939 | MUC12 | 2 | 0 |
| 3 | 195746765 | 195811973 | MUC4 | 3 | 1 |
| 13 | 77042474 | 77327094 | MYCBP2 | 2 | 0 |
| 17 | 8474207 | 8631376 | MYH10 | 2 | 0 |
| 17 | 10443290 | 10469559 | MYH4 | 3 | 0 |
| 22 | 36281280 | 36388010 | MYH9 | 2 | 0 |
| 3 | 123610049 | 123884332 | MYLK | 3 | 0 |
| 13 | 108596152 | 109208005 | MYO16 | 2 | 0 |
| 15 | 59132434 | 59372871 | MYO1E | 2 | 0 |
| 15 | 52307281 | 52529132 | MYO5A | 2 | 1 |
| 15 | 52192322 | 52295804 | MYO5C | 2 | 0 |
| 19 | 17075777 | 17214537 | MYO9B | 2 | 0 |
| 17 | 12665890 | 12768949 | MYOCD | 2 | 0 |
| 2 | 1789113 | 2331664 | MYT1L | 2 | 0 |
| 4 | 139301446 | 139420033 | NAA15 |  | 1 |
| 3 | 174438573 | 175810548 | NAALADL2 | 2 | 1 |
| 19 | 13116862 | 13141147 | NACC1 | 1 | 0 |
| 11 | 19350724 | 20121601 | NAV2 | 2 | 0 |
| 12 | 77324641 | 78213010 | NAV3 | 1 | 1 |
| 13 | 34942270 | 35673022 | NBEA | 2 | 0 |
| 22 | 50508224 | 50524780 | NCAPH2 | 2 | 0 |
| 2 | 182909115 | 183038858 | NCKAP1 | 2 | 0 |
| 2 | 132671788 | 133568463 | NCKAP5 | 2 | 0 |
| 2 | 24491254 | 24770702 | NCOA1 | 2 | 0 |
| 17 | 16029065 | 16218185 | NCOR1 | 2 | 0 |
| 7 | 123536997 | 123557904 | NDUFA5 | 2 | 0 |
| 1 | 71395943 | 72282539 | NEGR1 | 2 | 1 |
| 15 | 73051710 | 73305205 | NEO1 | 1 | 0 |
| 17 | 31094927 | 31382116 | NF1 | 2 | 0 |
| 7 | 26152198 | 26187137 | NFE2L3 | 2 | 0 |
| 1 | 60865259 | 61462788 | NFIA | 1 | 0 |
| 9 | 14081843 | 14398983 | NFIB | 2 | 0 |
| 19 | 12995475 | 13098796 | NFIX | 1 | 0 |
| 20 | 25451594 | 25585531 | NINL | 1 | 1 |
| 15 | 22773063 | 22829789 | NIPA1 | 2 | 0 |
| 15 | 22838644 | 22869362 | NIPA2 | 2 | 0 |
| 5 | 36876769 | 37066413 | NIPBL | 2 | 0 |
| 20 | 21511017 | 21514064 | NKX2-2 | 2 | 0 |
| 3 | 173396284 | 174294372 | NLGN1 | 2 | 0 |
| 17 | 7404874 | 7419860 | NLGN2 | 2 | 0 |
| 19 | 45933734 | 45974044 | NOVA2 | 1 | 0 |
| 2 | 100820139 | 100996829 | NPAS2 | 2 | 0 |
| 4 | 72031902 | 72148305 | NPFFR2 | 2 | 1 |
| 17 | 40092793 | 40100589 | NR1D1 | 2 | 0 |
| 5 | 93583222 | 93594611 | NR2F1 | 2 | 0 |
| 4 | 148078762 | 148444698 | NR3C2 | 2 | 0 |
| 2 | 156324437 | 156342348 | NR4A2 | 2 | 0 |
| 7 | 108147623 | 108456717 | NRCAM | 2 | 0 |
| 2 | 205681990 | 205798133 | NRP2 | 2 | 0 |
| 2 | 49918503 | 51225575 | NRXN1 | 2 | 0 |
| 11 | 64606174 | 64723197 | NRXN2 | 2 | 0 |
| 14 | 78170373 | 79868291 | NRXN3 | 1 | 0 |
| 5 | 177131830 | 177300213 | NSD1 | 1 | 1 |
| 4 | 1871393 | 1982207 | NSD2 | 3 | 0 |
| 15 | 29264989 | 29269822 | NSMCE3 | 3 | 0 |
| 1 | 107140007 | 107484923 | NTNG1 | 2 | 0 |
| 9 | 132162058 | 132244526 | NTNG2 | 2 | 0 |
| 1 | 156815636 | 156881850 | NTRK1 | 2 | 0 |
| 9 | 84668375 | 85095751 | NTRK2 | 2 | 0 |
| 15 | 87859751 | 88256791 | NTRK3 |  | 1 |
| 12 | 106063345 | 106138954 | NUAK1 | 3 | 0 |
| 5 | 163446526 | 163460102 | NUDCD2 | 2 | 0 |
| 1 | 229440259 | 229508341 | NUP133 | 1 | 0 |
| 5 | 37288137 | 37371106 | NUP155 | 3 | 0 |
| 11 | 62792123 | 62806302 | NXF1 | 1 | 0 |
| 7 | 8433609 | 8752961 | NXPH1 | 2 | 1 |
| 1 | 247754846 | 247760556 | OR1C1 | 2 | 1 |
| 1 | 248231417 | 248244679 | OR2M4 | 2 | 0 |
| 1 | 248590487 | 248597700 | OR2T10 | 1 | 0 |
| 11 | 4545191 | 4546144 | OR52M1 | 2 | 0 |
| 15 | 31475398 | 31870789 | OTUD7A | 3 | 1 |
| 2 | 63050057 | 63057836 | OTX1 | 2 | 0 |
| 20 | 3071620 | 3072517 | OXT | 1 | 1 |
| 3 | 8750381 | 8769628 | OXTR | 2 | 0 |
| 17 | 3672199 | 3696240 | P2RX5 | 2 | 0 |
| 5 | 132190147 | 132295315 | P4HA2 | 2 | 0 |
| 8 | 100685816 | 100722809 | PABPC1 | 2 | 0 |
| 11 | 66070272 | 66244744 | PACS1 | 1 | 0 |
| 14 | 105300563 | 105398147 | PACS2 | 2 | 0 |
| 11 | 117144284 | 117176894 | PAFAH1B2 | 1 | 0 |
| 12 | 102836889 | 102958410 | PAH | 2 | 0 |
| 11 | 77322017 | 77474635 | PAK1 | 3 | 1 |
| 3 | 196739857 | 196832647 | PAK2 | 2 | 0 |
| 2 | 60756253 | 60802086 | PAPOLG | 2 | 0 |
| 2 | 204545475 | 205620162 | PARD3B | 2 | 1 |
| 1 | 61742477 | 62178675 | PATJ | 2 | 0 |
| 9 | 36833269 | 37034268 | PAX5 | 2 | 0 |
| 11 | 31784779 | 31817961 | PAX6 | 2 | 0 |
| 1 | 164555584 | 164899296 | PBX1 | 2 | 0 |
| 11 | 66848417 | 66958386 | PC | 3 | 0 |
| 13 | 100089015 | 100530437 | PCCA | 2 | 0 |
| 3 | 136250340 | 136337896 | PCCB | 1 | 0 |
| 4 | 133149294 | 133208606 | PCDH10 | 2 | 0 |
| 10 | 53802771 | 55627942 | PCDH15 |  | 1 |
| 13 | 66302834 | 67230445 | PCDH9 | 3 | 0 |
| 5 | 140786136 | 141012347 | PCDHA1 | 1 | 0 |
| 7 | 82754012 | 83162930 | PCLO |  | 1 |
| 8 | 17922842 | 18029948 | PCM1 | 2 | 0 |
| 2 | 241849884 | 241858894 | PDCD1 | 2 | 0 |
| 7 | 31751179 | 32428131 | PDE1C | 2 | 0 |
| 11 | 14643804 | 14872044 | PDE3B | 1 | 0 |
| 17 | 50094737 | 50112152 | PDK2 | 1 | 0 |
| 10 | 117277274 | 117375440 | PDZD8 | 2 | 0 |
| 8 | 22713251 | 23000000 | PEBP4 | 2 | 0 |
| 17 | 8140472 | 8156506 | PER1 | 1 | 0 |
| 2 | 238244044 | 238290102 | PER2 | 2 | 0 |
| 6 | 136822564 | 136913934 | PEX7 | 1 | 1 |
| 17 | 49404049 | 49414905 | PHB1 | 2 | 0 |
| 17 | 28905250 | 28951771 | PHF12 | 2 | 0 |
| 7 | 10973336 | 11169623 | PHF14 | 2 | 0 |
| 9 | 93576584 | 93679587 | PHF2 | 2 | 0 |
| 11 | 45929319 | 46121454 | PHF21A | 2 | 0 |
| 6 | 63635802 | 63779336 | PHF3 | 1 | 1 |
| 3 | 52410660 | 52423641 | PHF7 | 3 | 0 |
| 6 | 78934419 | 79078287 | PHIP | 2 | 0 |
| 18 | 62715541 | 62980433 | PHLPP1 | 3 | 0 |
| 11 | 576470 | 612222 | PHRF1 | 2 | 0 |
| 3 | 179148114 | 179240093 | PIK3CA | 1 | 0 |
| 7 | 106865278 | 106908980 | PIK3CG | 2 | 0 |
| 19 | 18153163 | 18170532 | PIK3R2 | 2 | 0 |
| 5 | 135027734 | 135034813 | PITX1 | 1 | 1 |
| 19 | 43646095 | 43670547 | PLAUR | 1 | 1 |
| 20 | 8077251 | 8968360 | PLCB1 | 2 | 0 |
| 2 | 218607855 | 218637184 | PLCD4 | 2 | 0 |
| 7 | 30027404 | 30130483 | PLEKHA8 | 2 | 0 |
| 6 | 118548296 | 118561716 | PLN |  | 1 |
| 1 | 99264292 | 99309590 | PLPPR4 | 1 | 0 |
| 7 | 132123340 | 132648688 | PLXNA4 | 1 | 0 |
| 3 | 48403854 | 48430086 | PLXNB1 | 1 | 1 |
| 9 | 137459952 | 137550402 | PNPLA7 | 1 | 1 |
| 1 | 151402724 | 151459494 | POGZ | 2 | 0 |
| 11 | 65261913 | 65305959 | POLA2 | 2 | 0 |
| 17 | 7484366 | 7514616 | POLR2A | 2 | 0 |
| 10 | 77953148 | 78029522 | POLR3A | 1 | 1 |
| 1 | 46188683 | 46220305 | POMGNT1 | 3 | 0 |
| 9 | 131502789 | 131523806 | POMT1 |  | 1 |
| 7 | 95297676 | 95324532 | PON1 | 2 | 0 |
| 7 | 124822386 | 124929983 | POT1 | 2 | 0 |
| 2 | 104853287 | 104858574 | POU3F3 | 2 | 0 |
| 11 | 70270690 | 70385312 | PPFIA1 | 2 | 0 |
| 17 | 60600193 | 60666280 | PPM1D |  | 1 |
| 17 | 39626740 | 39636626 | PPP1R1B |  | 1 |
| 17 | 50133737 | 50150677 | PPP1R9B | 2 | 0 |
| 5 | 134194035 | 134226073 | PPP2CA | 1 | 0 |
| 11 | 111726908 | 111766389 | PPP2R1B | 2 | 0 |
| 6 | 42984553 | 43012342 | PPP2R5D | 2 | 0 |
| 4 | 101023409 | 101348278 | PPP3CA | 2 | 0 |
| 19 | 46347087 | 46392981 | PPP5C | 2 | 0 |
| 20 | 48624252 | 48827999 | PREX1 |  | 1 |
| 12 | 42456757 | 42590355 | PRICKLE1 | 2 | 0 |
| 3 | 64092236 | 64445476 | PRICKLE2 | 1 | 0 |
| 7 | 549197 | 727650 | PRKAR1B | 2 | 0 |
| 17 | 66302613 | 66810743 | PRKCA | 2 | 0 |
| 16 | 23835983 | 24220611 | PRKCB | 1 | 0 |
| 14 | 29576479 | 30191898 | PRKD1 | 2 | 0 |
| 19 | 46674275 | 46717127 | PRKD2 | 2 | 0 |
| 8 | 47773111 | 47960178 | PRKDC | 2 | 0 |
| 6 | 161347417 | 162727775 | PRKN | 2 | 0 |
| 22 | 18912777 | 18936553 | PRODH | 1 | 1 |
| 14 | 45084107 | 45116282 | PRPF39 | 2 | 0 |
| 17 | 1650629 | 1684867 | PRPF8 | 2 | 1 |
| 19 | 49591182 | 49626439 | PRR12 | 1 | 0 |
| 22 | 31676256 | 31750140 | PRR14L | 2 | 1 |
| 9 | 76611376 | 76906114 | PRUNE2 | 2 | 0 |
| 8 | 18527303 | 19084730 | PSD3 | 1 | 0 |
| 17 | 32444379 | 32483319 | PSMD11 | 2 | 0 |
| 17 | 67337916 | 67366605 | PSMD12 | 1 | 1 |
| 3 | 64010550 | 64024010 | PSMD6 | 2 | 0 |
| 1 | 96721665 | 96823738 | PTBP2 | 1 | 0 |
| 8 | 96261902 | 96336995 | PTDSS1 | 2 | 0 |
| 10 | 87862638 | 87971930 | PTEN | 2 | 0 |
| 1 | 186671791 | 186680922 | PTGS2 | 2 | 0 |
| 6 | 43076307 | 43161719 | PTK7 | 2 | 0 |
| 12 | 112418351 | 112509918 | PTPN11 | 1 | 1 |
| 2 | 119759922 | 119984899 | PTPN4 | 3 | 0 |
| 12 | 70515870 | 70637440 | PTPRB | 3 | 0 |
| 1 | 198638457 | 198757476 | PTPRC | 2 | 0 |
| 20 | 42072752 | 43189970 | PTPRT | 1 | 1 |
| 2 | 1631887 | 1744852 | PXDN | 3 | 1 |
| 1 | 158930796 | 158977059 | PYHIN1 | 1 | 1 |
| 3 | 49029707 | 49094363 | QRICH1 | 2 | 0 |
| 2 | 73073382 | 73156721 | RAB11FIP5 | 2 | 0 |
| 8 | 60516936 | 60623644 | RAB2A | 2 | 0 |
| 3 | 129087569 | 129122801 | RAB43 | 2 | 0 |
| 7 | 6374527 | 6403967 | RAC1 | 2 | 0 |
| 8 | 116845934 | 116874776 | RAD21 | 2 | 0 |
| 20 | 1226044 | 1296421 | RAD21L1 | 2 | 0 |
| 17 | 17681458 | 17811453 | RAI1 | 2 | 0 |
| 7 | 39623565 | 39708120 | RALA | 2 | 0 |
| 20 | 38472816 | 38578859 | RALGAPB |  | 1 |
| 5 | 170861870 | 171300015 | RANBP17 |  | 1 |
| 2 | 172735274 | 173052893 | RAPGEF4 | 2 | 0 |
| 1 | 206507531 | 206589448 | RASSF5 | 3 | 0 |
| 1 | 205086142 | 205122015 | RBBP5 | 2 | 0 |
| 16 | 5239802 | 7713340 | RBFOX1 | 2 | 0 |
| 5 | 146203605 | 146289223 | RBM27 | 2 | 0 |
| 10 | 63521401 | 63625128 | REEP3 |  | 1 |
| 7 | 103471381 | 103989658 | RELN | 2 | 0 |
| 1 | 8352397 | 8848921 | RERE | 1 | 1 |
| 9 | 3218297 | 3526004 | RFX3 | 3 | 1 |
| 12 | 106583004 | 106762803 | RFX4 | 1 | 0 |
| 15 | 56087280 | 56245082 | RFX7 | 1 | 1 |
| 1 | 240767636 | 241357374 | RGS7 |  | 1 |
| 7 | 151466012 | 151520120 | RHEB | 3 | 0 |
| 6 | 71886550 | 72403150 | RIMS1 | 1 | 0 |
| 8 | 103500610 | 104254430 | RIMS2 | 3 | 0 |
| 1 | 40620680 | 40665682 | RIMS3 | 2 | 0 |
| 18 | 42743227 | 43115691 | RIT2 | 2 | 1 |
| 17 | 30970984 | 30999911 | RNF135 | 3 | 0 |
| 2 | 218663892 | 218672002 | RNF25 | 3 | 0 |
| 9 | 36336396 | 36487548 | RNF38 | 2 | 0 |
| 3 | 75906695 | 77649964 | ROBO2 | 2 | 0 |
| 15 | 60488284 | 61229302 | RORA |  | 1 |
| 9 | 74497335 | 74693177 | RORB | 1 | 0 |
| 12 | 112570380 | 112898881 | RPH3A | 2 | 0 |
| 6 | 166409364 | 166906451 | RPS6KA2 | 1 | 0 |
| 3 | 158105855 | 158545730 | RSRC1 | 1 | 1 |
| 8 | 91954972 | 92103286 | RUNX1T1 | 2 | 0 |
| 19 | 47113274 | 47210636 | SAE1 | 1 | 0 |
| 1 | 923923 | 944575 | SAMD11 | 2 | 0 |
| 6 | 148272304 | 148552044 | SASH1 | 3 | 1 |
| 3 | 18345377 | 18445621 | SATB1 | 2 | 0 |
| 2 | 199269505 | 199471266 | SATB2 | 1 | 0 |
| 22 | 50443219 | 50483923 | SBF1 | 2 | 0 |
| 19 | 49642209 | 49658642 | SCAF1 | 2 | 0 |
| 21 | 31671000 | 31732118 | SCAF4 | 2 | 0 |
| 4 | 52872982 | 53366066 | SCFD2 | 2 | 0 |
| 6 | 25652201 | 25701783 | SCGN | 1 | 0 |
| 2 | 165984641 | 166149214 | SCN1A | 3 | 0 |
| 2 | 165194993 | 165392310 | SCN2A | 2 | 0 |
| 17 | 63938554 | 63972918 | SCN4A | 2 | 0 |
| 12 | 51590266 | 51812864 | SCN8A | 1 | 1 |
| 2 | 166195185 | 166376001 | SCN9A | 2 | 0 |
| 1 | 52927276 | 53051698 | SCP2 | 2 | 0 |
| 8 | 96493813 | 96611790 | SDC2 |  | 1 |
| 5 | 9035033 | 9546075 | SEMA5A | 1 | 1 |
| 12 | 48039784 | 48106079 | SENP1 | 2 | 0 |
| 7 | 101127104 | 101139247 | SERPINE1 | 1 | 1 |
| 9 | 128683424 | 128696400 | SET | 2 | 0 |
| 18 | 44680173 | 45068510 | SETBP1 | 2 | 0 |
| 16 | 30957294 | 30984664 | SETD1A | 2 | 0 |
| 12 | 121804009 | 121832656 | SETD1B | 2 | 0 |
| 3 | 47016428 | 47164113 | SETD2 | 2 | 0 |
| 3 | 9397615 | 9479240 | SETD5 | 1 | 1 |
| 1 | 150926263 | 150964744 | SETDB1 | 3 | 0 |
| 13 | 49444274 | 49495003 | SETDB2 | 2 | 0 |
| 16 | 29871159 | 29899550 | SEZ6L2 | 1 | 0 |
| 2 | 197388515 | 197435079 | SF3B1 | 1 | 0 |
| 17 | 80206716 | 80220923 | SGSH | 2 | 0 |
| 22 | 40370591 | 40410289 | SGSM3 | 2 | 0 |
| 4 | 169094259 | 169270956 | SH3RF1 | 3 | 0 |
| 2 | 109129205 | 109504634 | SH3RF3 | 1 | 1 |
| 19 | 50659255 | 50719802 | SHANK1 | 2 | 0 |
| 11 | 70467854 | 71252577 | SHANK2 | 2 | 0 |
| 22 | 50674415 | 50733212 | SHANK3 | 1 | 1 |
| 21 | 43414483 | 43427131 | SIK1 | 1 | 1 |
| 15 | 75369379 | 75455842 | SIN3A | 3 | 1 |
| 19 | 16829398 | 16880353 | SIN3B | 2 | 0 |
| 1 | 2227388 | 2310213 | SKI | 2 | 0 |
| 20 | 46021690 | 46060150 | SLC12A5 | 2 | 0 |
| 9 | 4490468 | 4587469 | SLC1A1 | 3 | 1 |
| 11 | 35251205 | 35420063 | SLC1A2 | 2 | 0 |
| 1 | 115976513 | 116070054 | SLC22A15 | 2 | 0 |
| 11 | 63369785 | 63410294 | SLC22A9 | 2 | 0 |
| 5 | 139367196 | 139384553 | SLC23A1 | 2 | 1 |
| 9 | 19507452 | 19789037 | SLC24A2 | 1 | 1 |
| 2 | 171783405 | 171999859 | SLC25A12 | 2 | 0 |
| 6 | 46652915 | 46678190 | SLC25A27 | 2 | 0 |
| 17 | 44319625 | 44324870 | SLC25A39 | 2 | 0 |
| 9 | 128340527 | 128361470 | SLC27A4 | 2 | 0 |
| 7 | 5274369 | 5306912 | SLC29A4 | 2 | 0 |
| 17 | 49700934 | 49709014 | SLC35B1 | 2 | 0 |
| 10 | 93893973 | 93956062 | SLC35G1 | 2 | 0 |
| 17 | 81244811 | 81295547 | SLC38A10 | 2 | 0 |
| 1 | 8318114 | 8344167 | SLC45A1 | 1 | 1 |
| 2 | 161424332 | 161985282 | SLC4A10 | 2 | 0 |
| 3 | 10992186 | 11039247 | SLC6A1 | 2 | 0 |
| 5 | 1392794 | 1445440 | SLC6A3 |  | 1 |
| 17 | 30194319 | 30236002 | SLC6A4 | 1 | 0 |
| 16 | 87830023 | 87869507 | SLC7A5 | 2 | 0 |
| 14 | 22773222 | 22829820 | SLC7A7 | 2 | 0 |
| 3 | 143265222 | 143848485 | SLC9A9 | 1 | 0 |
| 12 | 20810702 | 20916911 | SLCO1B3 | 3 | 0 |
| 17 | 35243071 | 35273655 | SLFN5 | 2 | 0 |
| 13 | 87671371 | 87696272 | SLITRK5 | 2 | 0 |
| 18 | 51028528 | 51085045 | SMAD4 | 3 | 0 |
| 9 | 1980290 | 2193624 | SMARCA2 | 2 | 0 |
| 19 | 10960932 | 11079426 | SMARCA4 | 2 | 0 |
| 12 | 56162359 | 56189567 | SMARCC2 | 2 | 0 |
| 10 | 110567684 | 110606048 | SMC3 |  | 1 |
| 17 | 2059839 | 2303785 | SMG6 | 2 | 0 |
| 7 | 99027440 | 99144108 | SMURF1 | 3 | 0 |
| 20 | 10172395 | 10308258 | SNAP25 | 1 | 1 |
| 5 | 122311354 | 122464219 | SNCAIP | 3 | 0 |
| 7 | 127652194 | 128092609 | SND1 | 1 | 0 |
| 2 | 950849 | 1367613 | SNTG2 | 1 | 0 |
| 6 | 85504776 | 85594156 | SNX14 | 2 | 0 |
| 20 | 17941597 | 17968980 | SNX5 | 2 | 0 |
| 21 | 31659666 | 31668931 | SOD1 | 1 | 0 |
| 21 | 33543038 | 33577481 | SON | 1 | 1 |
| 10 | 104641290 | 105265242 | SORCS3 | 2 | 0 |
| 14 | 50117130 | 50231578 | SOS2 | 2 | 1 |
| 12 | 23529504 | 24562544 | SOX5 | 2 | 0 |
| 11 | 15966449 | 16739591 | SOX6 | 2 | 0 |
| 4 | 87473335 | 87531061 | SPARCL1 |  | 1 |
| 2 | 32063556 | 32157637 | SPAST | 1 | 0 |
| 1 | 15836095 | 15940456 | SPEN | 2 | 0 |
| 2 | 234050679 | 234077134 | SPP2 | 2 | 0 |
| 13 | 80335976 | 80341126 | SPRY2 | 2 | 0 |
| 2 | 54456317 | 54671446 | SPTBN1 | 2 | 0 |
| 16 | 30698209 | 30741409 | SRCAP | 1 | 1 |
| 3 | 8980591 | 9363053 | SRGAP3 | 2 | 0 |
| 11 | 126262938 | 126269144 | SRPRA | 1 | 1 |
| 16 | 2752626 | 2772538 | SRRM2 | 2 | 0 |
| 17 | 58000919 | 58007346 | SRSF1 | 2 | 0 |
| 1 | 70205682 | 70253052 | SRSF11 | 2 | 0 |
| 11 | 57325986 | 57335892 | SSRP1 | 3 | 1 |
| 7 | 116953238 | 117230176 | ST7 | 2 | 0 |
| 15 | 92393881 | 92468728 | ST8SIA2 | 3 | 0 |
| 3 | 136336236 | 136752403 | STAG1 | 1 | 0 |
| 2 | 167954020 | 168247595 | STK39 | 2 | 0 |
| 7 | 73699206 | 73719672 | STX1A | 3 | 0 |
| 9 | 127579370 | 127696027 | STXBP1 | 2 | 0 |
| 6 | 147204180 | 147391010 | STXBP5 | 2 | 0 |
| 12 | 10618923 | 10674318 | STYK1 | 2 | 1 |
| 14 | 21351476 | 21384019 | SUPT16H | 1 | 1 |
| 8 | 109573978 | 109691791 | SYBU | 2 | 0 |
| 10 | 133553901 | 133569835 | SYCE1 | 2 | 0 |
| 3 | 12004388 | 12192032 | SYN2 |  | 1 |
| 6 | 85607779 | 85644063 | SYNCRIP | 2 | 0 |
| 6 | 152121687 | 152637801 | SYNE1 | 2 | 0 |
| 6 | 33419661 | 33453689 | SYNGAP1 |  | 1 |
| 21 | 32628759 | 32728040 | SYNJ1 | 3 | 1 |
| 12 | 78863993 | 79452008 | SYT1 | 1 | 1 |
| 16 | 19167971 | 19268332 | SYT17 | 1 | 0 |
| 16 | 84177847 | 84187070 | TAF1C | 1 | 1 |
| 20 | 61953469 | 62065881 | TAF4 | 2 | 0 |
| 7 | 100106876 | 100119841 | TAF6 | 1 | 0 |
| 17 | 62966235 | 63427703 | TANC2 |  | 1 |
| 17 | 29390363 | 29551903 | TAOK1 | 2 | 1 |
| 16 | 29973868 | 29992261 | TAOK2 | 2 | 0 |
| 3 | 100260992 | 100325251 | TBC1D23 | 2 | 0 |
| 8 | 123041968 | 123152153 | TBC1D31 | 2 | 0 |
| 3 | 17157162 | 18444817 | TBC1D5 | 1 | 0 |
| 11 | 121024072 | 121090776 | TBCEL | 2 | 1 |
| 4 | 106041599 | 106316683 | TBCK | 2 | 0 |
| 3 | 177019340 | 177228000 | TBL1XR1 | 2 | 0 |
| 2 | 161416297 | 161425870 | TBR1 | 1 | 1 |
| 22 | 19756703 | 19783593 | TBX1 | 1 | 1 |
| 22 | 42160013 | 42343616 | TCF20 | 1 | 1 |
| 18 | 55222185 | 55664787 | TCF4 |  | 1 |
| 10 | 112950247 | 113167678 | TCF7L2 | 1 | 1 |
| 4 | 155854738 | 155920406 | TDO2 | 2 | 0 |
| 11 | 121101243 | 121191490 | TECTA |  | 1 |
| 9 | 27109141 | 27230174 | TEK | 3 | 0 |
| 15 | 44956687 | 44979229 | TERB2 | 2 | 0 |
| 16 | 69355567 | 69408571 | TERF2 | 2 | 0 |
| 4 | 105145875 | 105279816 | TET2 |  | 1 |
| 2 | 73984910 | 74108176 | TET3 | 2 | 0 |
| 1 | 246540561 | 246566261 | TFB2M | 1 | 1 |
| 14 | 24249114 | 24264432 | TGM1 | 2 | 0 |
| 15 | 39581079 | 39599466 | THBS1 | 1 | 0 |
| 17 | 40058290 | 40093867 | THRA | 1 | 1 |
| 15 | 70047790 | 70098176 | TLE3 | 2 | 0 |
| 17 | 62458658 | 62615481 | TLK2 | 2 | 0 |
| 3 | 196319342 | 196338503 | TM4SF19 | 2 | 1 |
| 2 | 227362038 | 227381995 | TM4SF20 | 1 | 0 |
| 20 | 32109714 | 32167258 | TM9SF4 | 3 | 0 |
| 11 | 67461710 | 67469272 | TMEM134 | 2 | 0 |
| 1 | 32072031 | 32102866 | TMEM39B | 3 | 0 |
| 7 | 128954180 | 129055173 | TNPO3 |  | 1 |
| 22 | 40044817 | 40335808 | TNRC6B | 1 | 0 |
| 17 | 77958703 | 78108822 | TNRC6C | 1 | 1 |
| 12 | 53046969 | 53064379 | TNS2 | 3 | 0 |
| 3 | 25597978 | 25664909 | TOP2B | 2 | 0 |
| 22 | 21957025 | 21982813 | TOP3B | 1 | 0 |
| 2 | 1374066 | 1543711 | TPO | 2 | 0 |
| 16 | 2155698 | 2178129 | TRAF7 | 1 | 1 |
| 16 | 88856220 | 88862686 | TRAPPC2L | 3 | 0 |
| 14 | 39147811 | 39170532 | TRAPPC6B | 3 | 0 |
| 8 | 139727725 | 140458579 | TRAPPC9 | 1 | 1 |
| 5 | 65589690 | 65625975 | TRIM23 | 2 | 0 |
| 1 | 114392790 | 114511203 | TRIM33 | 1 | 1 |
| 10 | 102642503 | 102658318 | TRIM8 | 2 | 0 |
| 5 | 14143342 | 14532128 | TRIO | 1 | 1 |
| 2 | 229763837 | 229923239 | TRIP12 | 2 | 0 |
| 11 | 101451564 | 101872562 | TRPC6 | 1 | 0 |
| 15 | 31001065 | 31161160 | TRPM1 |  | 1 |
| 9 | 70529060 | 71446904 | TRPM3 | 2 | 0 |
| 9 | 74722495 | 74888094 | TRPM6 |  | 1 |
| 7 | 98877933 | 99050831 | TRRAP | 2 | 0 |
| 9 | 132891348 | 132946874 | TSC1 | 1 | 1 |
| 16 | 2047967 | 2089491 | TSC2 | 1 | 1 |
| 18 | 75210755 | 75289950 | TSHZ1 | 2 | 0 |
| 19 | 31149979 | 31349436 | TSHZ3 | 2 | 0 |
| 5 | 176647387 | 176659054 | TSPAN17 | 2 | 0 |
| 11 | 842812 | 867116 | TSPAN4 | 2 | 0 |
| 17 | 58301228 | 58328795 | TSPOAP1 | 1 | 0 |
| 8 | 33473386 | 33513185 | TTI2 | 2 | 0 |
| 2 | 178525989 | 178830802 | TTN | 2 | 0 |
| 15 | 22983192 | 23039572 | TUBGCP5 | 2 | 0 |
| 1 | 154220179 | 154271510 | UBAP2L | 2 | 0 |
| 7 | 129830732 | 129952960 | UBE2H | 1 | 1 |
| 15 | 25333728 | 25439051 | UBE3A | 1 | 0 |
| 7 | 157138926 | 157269370 | UBE3C | 2 | 0 |
| 7 | 139230356 | 139308236 | UBN2 | 3 | 0 |
| 15 | 42942897 | 43106113 | UBR1 | 2 | 0 |
| 8 | 102252273 | 102412759 | UBR5 | 2 | 0 |
| 5 | 176905005 | 177022633 | UIMC1 |  | 1 |
| 19 | 17601336 | 17688365 | UNC13A | 3 | 0 |
| 8 | 35235475 | 35796550 | UNC5D | 2 | 0 |
| 14 | 93333219 | 93707876 | UNC79 | 2 | 0 |
| 2 | 209771832 | 209999300 | UNC80 |  | 1 |
| 10 | 11920022 | 12043170 | UPF2 | 2 | 0 |
| 1 | 215622891 | 216423448 | USH2A | 2 | 0 |
| 12 | 62260338 | 62417431 | USP15 | 2 | 1 |
| 12 | 109023089 | 109088023 | USP30 | 3 | 0 |
| 6 | 99432325 | 99521728 | USP45 | 3 | 0 |
| 16 | 8892097 | 8975328 | USP7 | 2 | 0 |
| 17 | 8159149 | 8163546 | VAMP2 | 1 | 1 |
| 14 | 76761468 | 76783015 | VASH1 |  | 1 |
| 12 | 47841537 | 47943048 | VDR |  | 1 |
| 17 | 57971547 | 57988259 | VEZF1 | 1 | 1 |
| 2 | 218419121 | 218453295 | VIL1 | 3 | 0 |
| 8 | 99013266 | 99877580 | VPS13B | 3 | 0 |
| 2 | 63892146 | 64019428 | VPS54 | 2 | 0 |
| 6 | 31765590 | 31777328 | VWA7 | 1 | 1 |
| 10 | 28532493 | 28623112 | WAC | 2 | 0 |
| 6 | 110099819 | 110180004 | WASF1 | 2 | 0 |
| 4 | 84668765 | 84966690 | WDFY3 |  | 1 |
| 10 | 48684873 | 48982956 | WDFY4 |  | 1 |
| 1 | 224385146 | 224437033 | WDR26 | 2 | 0 |
| 9 | 134135365 | 134159968 | WDR5 | 2 | 0 |
| 12 | 48978322 | 48982620 | WNT1 | 2 | 0 |
| 16 | 78099400 | 79212667 | WWOX |  | 1 |
| 8 | 86342547 | 86478420 | WWP1 | 2 | 0 |
| 3 | 14145147 | 14178621 | XPC | 3 | 0 |
| 2 | 61476032 | 61538741 | XPO1 | 1 | 1 |
| 22 | 41621163 | 41664048 | XRCC6 | 2 | 1 |
| 3 | 183697797 | 183812624 | YEATS2 | 1 | 0 |
| 5 | 113513694 | 113595285 | YTHDC2 | 2 | 0 |
| 17 | 1344275 | 1400222 | YWHAE | 2 | 0 |
| 7 | 76326799 | 76358991 | YWHAG | 2 | 0 |
| 8 | 100916523 | 100953388 | YWHAZ | 2 | 0 |
| 14 | 100238298 | 100282788 | YY1 | 1 | 0 |
| 11 | 114059041 | 114256765 | ZBTB16 | 2 | 0 |
| 1 | 244048547 | 244057476 | ZBTB18 | 2 | 0 |
| 3 | 114314500 | 115147292 | ZBTB20 | 3 | 1 |
| 21 | 41986831 | 42010387 | ZBTB21 | 3 | 0 |
| 19 | 4043303 | 4066899 | ZBTB7A | 2 | 0 |
| 1 | 203795623 | 203854999 | ZC3H11A | 3 | 0 |
| 19 | 47064187 | 47113776 | ZC3H4 | 3 | 1 |
| 14 | 67727374 | 67816590 | ZFYVE26 | 2 | 0 |
| 10 | 79068966 | 79316519 | ZMIZ1 | 2 | 0 |
| 13 | 19958677 | 20091829 | ZMYM2 | 2 | 0 |
| 10 | 130088 | 254637 | ZMYND11 | 2 | 0 |
| 20 | 47209214 | 47356889 | ZMYND8 |  | 1 |
| 17 | 11977439 | 11997475 | ZNF18 | 2 | 0 |
| 6 | 87151803 | 87265943 | ZNF292 | 2 | 0 |
| 2 | 179441982 | 179861612 | ZNF385B | 2 | 0 |
| 9 | 106863166 | 107013634 | ZNF462 | 2 | 0 |
| 8 | 144798876 | 144811169 | ZNF517 | 2 | 0 |
| 19 | 57389850 | 57402992 | ZNF548 |  | 1 |
| 19 | 9323772 | 9351162 | ZNF559 | 1 | 0 |
| 19 | 20619939 | 20661596 | ZNF626 | 3 | 0 |
| 7 | 55887456 | 55942530 | ZNF713 | 3 | 0 |
| 15 | 90352284 | 90369146 | ZNF774 | 2 | 1 |
| 2 | 184598529 | 184939492 | ZNF804A |  | 1 |
| 4 | 145757627 | 145938823 | ZNF827 | 1 | 0 |
| 5 | 61332258 | 61546172 | ZSWIM6 | 1 | 0 |
| 15 | 66504959 | 66550130 | ZWILCH |  | 1 |

| **Supplementary Table S3:** List of PRS SNPs from Grove et al. (2019) used in model |
| --- |
| rs1620977_A |
| rs2391769_A |
| rs6701243_C |
| rs11185408_A |
| rs6692705_A |
| rs148587110_C |
| rs1452075_C |
| rs79940520_G |
| rs16854048_C |
| rs4916723_C |
| rs2635182_T |
| rs325485_A |
| rs325506_C |
| rs13188074_A |
| rs34509057_A |
| rs12203328_C |
| rs740883_T |
| rs2388334_G |
| rs6466055_A |
| rs10099100_C |
| rs11787216_T |
| rs13294439_C |
| rs45595836_T |
| rs141319505_G |
| rs61867293_T |
| rs1806153_T |
| rs117603308_T |
| rs55661361_A |
| rs12552_A |
| rs77691144_C |
| rs112635299_T |
| rs10149470_A |
| rs8063603_G |
| rs7405404_T |
| rs12942300_A |
| rs292441_G |
| rs138867053_A |
| rs6047270_T |
| rs910805_G |

| **Supplementary Table S4:** Databases and software used in model development and analysis | | | | | | | | |
| --- | --- | --- | --- | --- | --- | --- | --- | --- |
|  |  |  |  |  |  |  |  |  |
| Autism GWAS database | | | <https://www.ebi.ac.uk/gwas/efotraits/EFO_0003756> | | | | | accessed 26/09/24 |
| ADHD GWAS database | | | <https://www.ebi.ac.uk/gwas/efotraits/EFO_0003888> | | | | | accessed 26/09/24 |
| SFARI Gene database | | | https://gene.sfari.org/database/human-gene/ | | | | | accessed 28/03/24 |
| PLINK | Vers:1.90 | | https://www.cog-genomics.org/plink/ | | | |  |  |
| SHAP | Vers: 0.46 | | https://pypi.org/project/shap/#description | | | |  |  |
| phenogram | |  | https://visualization.ritchielab.org/phenograms/plot | | | | | accessed 11/09/24 |
| pycaret | Vers: 3.3.2 | | https://github.com/pycaret/pycaret/ | | | |  |  |
| ABAEnrichment | Vers:1.2.2 | | https://bioconductor.org/packages/3.3/bioc/html/ABAEnrichment.html | | | | | |

| **Supplementary Table S5**: Metrics of the balanced model | | | | |  |
| --- | --- | --- | --- | --- | --- |
|  | Accuracy | AUC | Recall | Precision | F1 |
| Validation Data | 0.66 | 0.7 | 0.66 | 0.61 | 0.64 |
| Training Data | 0.71 | 0.8 | 0.76 | 0.59 | 0.67 |

| **Female Sig. Genes** |
| --- |
| ADK |
| AFF2 |
| ANKRD17 |
| ARHGEF2 |
| ARHGEF9 |
| ASH1L |
| ATP2B1 |
| ATRX |
| BAIAP2L1 |
| BBS4 |
| BCORL1 |
| BRAF |
| BRINP3 |
| BRWD3 |
| CACNA1A |
| CADPS2 |
| CARD11 |
| CASK |
| CCNK |
| CDH2 |
| CDKL5 |
| CHD1 |
| CHM |
| CHRNA7 |
| CLCN4 |
| CNKSR2 |
| CSMD1 |
| CUX2 |
| DCC |
| DHX30 |
| DLG4 |
| DMD |
| DPP10 |
| DPP3 |
| DPYD |
| DPYSL3 |
| DYNC1H1 |
| ELOVL2 |
| EP400 |
| FAT1 |
| FGF13 |
| FOXP2 |
| FRMPD4 |
| GABRA3 |
| GABRG3 |
| GPD2 |
| GRB10 |
| GRIN2A |
| GRIN2B |
| GRM7 |
| HDAC8 |
| HECTD4 |
| HERC1 |
| HERC2 |
| HIVEP3 |
| HLA-G |
| HNRNPH2 |
| HOMER1 |
| HUWE1 |
| IL1RAPL1 |
| IL1RAPL2 |
| ITPR1 |
| KAT6B |
| KATNAL1 |
| KDM3A |
| KDM4C |
| KDM6A |
| KIRREL3 |
| KMT2C |
| LAS1L |
| LEMD3 |
| LEO1 |
| MAOA |
| MAOB |
| MECP2 |
| MEIS2 |
| MSL2 |
| MTOR |
| MYCBP2 |
| NAV2 |
| NAV3 |
| NBEA |
| NCKAP1 |
| NLGN4X |
| NRXN3 |
| NSD1 |
| NTNG1 |
| OCRL |
| OPHN1 |
| PCCB |
| PCDH11X |
| PCDH15 |
| PCDH19 |
| PDE3B |
| PHF3 |
| PHF8  **Supplementary Table S6:** Autism-associated SFARI genes that were significant for females |
| PIK3CG |
| POGZ |
| PPFIA1 |
| PPM1D |
| PRKCB |
| PRPF39 |
| PRR14L |
| PSMD11 |
| PTPN11 |
| QRICH1 |
| RAI1 |
| RALGAPB |
| RBBP5 |
| RFX3 |
| RHEB |
| RLIM |
| RNF38 |
| RPL10 |
| RPS6KA3 |
| RSRC1 |
| SAE1 |
| SASH1 |
| SETD1A |
| SLC1A1 |
| SLC1A2 |
| SLC22A15 |
| SLC45A1 |
| SLC7A7 |
| SLC9A6 |
| SMG6 |
| SOX6 |
| SRCAP |
| SRGAP3 |
| STAG1 |
| STX1A |
| SYNGAP1 |
| TAF1 |
| TBL1X |
| TBL1XR1 |
| TERF2 |
| TFE3 |
| TNRC6C |
| TRIP12 |
| TRPC5 |
| TRPM3 |
| TRRAP |
| TSPAN7 |
| UBAP2L |
| UBR1 |
| UNC5D |
| UNC79 |
| UPF3B |
| USH2A |
| USP7 |
| USP9X |
| VPS54 |
| WDFY3 |
| WNK3 |
| XRCC6 |
| YTHDC2 |
| ZNF292 |
| ZNF385B |
| ZNF711 |

| **Male Sig. Genes** |
| --- |
| ABCA13 |
| ABCE1 |
| ABL2 |
| ACTN4 |
| ACY1 |
| ADK |
| AFF2 |
| AGAP1 |
| AGBL4 |
| AGMO |
| AGO1 |
| AGO2 |
| AGO3 |
| AGO4 |
| AHDC1 |
| AHI1 |
| AHNAK |
| AMT |
| ANK3 |
| ANKRD17 |
| ANKS1B |
| AP1S2 |
| APBA2 |
| APBB1 |
| ARF3 |
| ARHGAP11B |
| ARHGAP32 |
| ARHGAP5 |
| ARHGEF2 |
| ARHGEF9 |
| ARID1B |
| ARID2 |
| ARNT2 |
| ASH1L |
| ASTN2 |
| ASXL3 |
| ATP2B1 |
| ATP2B2 |
| ATRX |
| AUTS2 |
| BACE1 |
| BAIAP2L1 |
| BAZ2B |
| BCAS1 |
| BCL11A |
| BCORL1 |
| BIRC6  **Supplementary Table S7:** Autism-associated SFARI genes that were significant for males |
| BRAF |
| BRD4 |
| BRINP3 |
| BRWD3 |
| BTAF1 |
| BTRC |
| CACNA1A |
| CACNA1B |
| CACNA1C |
| CACNA1I |
| CACNA2D1 |
| CACNA2D3 |
| CACNB2 |
| CACNG2 |
| CADM1 |
| CADM2 |
| CADPS |
| CADPS2 |
| CAMK2B |
| CAMK4 |
| CAPN12 |
| CAPRIN1 |
| CASK |
| CBX1 |
| CCDC88C |
| CCDC91 |
| CCNG1 |
| CCNK |
| CCSER1 |
| CDC42BPB |
| CDH11 |
| CDH13 |
| CDH2 |
| CDH22 |
| CDH9 |
| CDK13 |
| CDK19 |
| CDK5RAP2 |
| CDK8 |
| CDKL5 |
| CDON |
| CELF4 |
| CELF6 |
| CEP135 |
| CGNL1 |
| CHAMP1 |
| CHD1 |
| CHD2 |
| CHD7 |
| CHM |
| CHRM3 |
| CHRNA7 |
| CHST2 |
| CLASP1 |
| CLCN4 |
| CLIP2 |
| CLTCL1 |
| CMIP |
| CNKSR2 |
| CNOT1 |
| CNTN3 |
| CNTN5 |
| CNTNAP2 |
| CNTNAP4 |
| CNTNAP5 |
| CPEB4 |
| CPSF7 |
| CREBBP |
| CSMD1 |
| CSMD3 |
| CSNK1E |
| CSNK1G1 |
| CSNK2A1 |
| CSNK2B |
| CTCF |
| CTNNA2 |
| CTNNA3 |
| CTNND2 |
| CTTNBP2 |
| CUL3 |
| CUX1 |
| CUX2 |
| CYFIP1 |
| CYP27A1 |
| DAGLA |
| DDC |
| DEAF1 |
| DENR |
| DGKI |
| DHCR7 |
| DHX30 |
| DHX9 |
| DIP2A |
| DIXDC1 |
| DLG1 |
| DLG2 |
| DLGAP1 |
| DLGAP3 |
| DMD |
| DMWD |
| DNAH10 |
| DNAH3 |
| DNMT3A |
| DOCK1 |
| DOCK4 |
| DOCK8 |
| DPP10 |
| DPP3 |
| DPP4 |
| DPYD |
| DPYSL2 |
| DPYSL3 |
| DRD3 |
| DSCAM |
| DST |
| DYDC1 |
| DYDC2 |
| DYNC1H1 |
| DYRK1A |
| EFR3A |
| EHMT1 |
| EIF4E |
| EIF4G1 |
| ELP4 |
| ENPP1 |
| EP300 |
| EP400 |
| EPC2 |
| EPHB1 |
| ERG |
| ESR2 |
| ESRRB |
| FABP4 |
| FAN1 |
| FBXL13 |
| FBXO11 |
| FBXO40 |
| FGF13 |
| FGF14 |
| FHIT |
| FMR1 |
| FOXP1 |
| FOXP2 |
| FRK |
| FRMPD4 |
| FXN |
| G3BP2 |
| GABRA3 |
| GABRA4 |
| GABRB3 |
| GABRG2 |
| GABRG3 |
| GALNT10 |
| GALNT13 |
| GALNT14 |
| GALNT8 |
| GAS2 |
| GGNBP2 |
| GIGYF1 |
| GIGYF2 |
| GNAS |
| GNB1L |
| GPC4 |
| GPC5 |
| GPC6 |
| GPD2 |
| GPR85 |
| GRIA1 |
| GRIA2 |
| GRID1 |
| GRID2 |
| GRID2IP |
| GRIK2 |
| GRIK3 |
| GRIK4 |
| GRIK5 |
| GRIN2A |
| GRIN2B |
| GRIP1 |
| GRM7 |
| GTF2I |
| GUCY1A2 |
| HCN1 |
| HDAC8 |
| HDLBP |
| HECTD4 |
| HECW2 |
| HERC2 |
| HIVEP3 |
| HLA-A |
| HNRNPH2 |
| HNRNPR |
| IGF1 |
| IL1RAPL1 |
| IL1RAPL2 |
| IMMP2L |
| ITPR1 |
| ITSN1 |
| JMJD1C |
| KANK1 |
| KAT2B |
| KAT6A |
| KAT6B |
| KATNAL1 |
| KATNAL2 |
| KCNB1 |
| KCNC2 |
| KCNH5 |
| KCNMA1 |
| KCTD13 |
| KDM1B |
| KDM2A |
| KDM2B |
| KDM3A |
| KDM3B |
| KDM5A |
| KDM5B |
| KDM5C |
| KHDRBS2 |
| KIAA0232 |
| KIF13B |
| KIF14 |
| KIF5C |
| KIRREL3 |
| KLF7 |
| KLHL20 |
| KMT2A |
| KMT2C |
| KNG1 |
| KRR1 |
| LAMA1 |
| LAMB1 |
| LAS1L |
| LDLR |
| LEMD3 |
| LIN7B |
| LRBA |
| LRFN5 |
| LRP2 |
| LRRC1 |
| MACROD2 |
| MAOA |
| MAOB |
| MAP1A |
| MAP1B |
| MAP4K4 |
| MAPK3 |
| MARK1 |
| MARK2 |
| MBD3 |
| MBD4 |
| MCM4 |
| MCM6 |
| MCPH1 |
| MDGA2 |
| MDGA2 |
| MECP2 |
| MED12L |
| MED13 |
| MED13L |
| MED23 |
| MEIS2 |
| MEMO1 |
| MIB1 |
| MSL2 |
| MSR1 |
| MSRA |
| MTF1 |
| MTOR |
| MUC12 |
| MUC4 |
| MYCBP2 |
| MYH10 |
| MYH9 |
| MYLK |
| MYO16 |
| MYO5A |
| MYO9B |
| MYOCD |
| NAA15 |
| NBEA |
| NCAPH2 |
| NCKAP1 |
| NCOA1 |
| NCOR1 |
| NDUFA5 |
| NEGR1 |
| NEO1 |
| NF1 |
| NFIA |
| NFIX |
| NIPBL |
| NLGN1 |
| NLGN4X |
| NPAS2 |
| NPFFR2 |
| NR3C2 |
| NR4A2 |
| NRCAM |
| NRXN1 |
| NRXN3 |
| NTNG1 |
| NTNG2 |
| NUDCD2 |
| NUP133 |
| NUP155 |
| NXF1 |
| OCRL |
| OTUD7A |
| PABPC1 |
| PACS1 |
| PACS2 |
| PAFAH1B2 |
| PAPOLG |
| PARD3B |
| PBX1 |
| PC |
| PCCA |
| PCCB |
| PCDH15 |
| PCDH9 |
| PCDHA1 |
| PCLO |
| PDE1C |
| PDE3B |
| PEBP4 |
| PEX7 |
| PHF21A |
| PHF3 |
| PHF7 |
| PHF8 |
| PHIP |
| PHLPP1 |
| PIK3CA |
| PIK3CG |
| PIK3R2 |
| PLCB1 |
| PLCD4 |
| PNPLA7 |
| POGZ |
| POLA2 |
| POLR3A |
| POT1 |
| PPFIA1 |
| PPM1D |
| PRICKLE1 |
| PRKCA |
| PRKD1 |
| PRKDC |
| PRPF39 |
| PRPF8 |
| PRR14L |
| PRUNE2 |
| PSD3 |
| PSMD11 |
| PSMD12 |
| PTBP2 |
| PTEN |
| PTK7 |
| PTPN11 |
| PTPN4 |
| PTPRB |
| PTPRT |
| PYHIN1 |
| QRICH1 |
| RAB43 |
| RAD21 |
| RAI1 |
| RALA |
| RALGAPB |
| RANBP17 |
| RASSF5 |
| RBFOX1 |
| RBM27 |
| REEP3 |
| RELN |
| RERE |
| RFX7 |
| RGS7 |
| RHEB |
| RIMS1 |
| RIMS3 |
| RNF135 |
| RNF25 |
| RNF38 |
| ROBO2 |
| RORA |
| RPL10 |
| RPS6KA3 |
| RSRC1 |
| RUNX1T1 |
| SAE1 |
| SASH1 |
| SATB2 |
| SCAF4 |
| SCFD2 |
| SCN1A |
| SCN2A |
| SCN8A |
| SCN9A |
| SCP2 |
| SDC2 |
| SEMA5A |
| SETBP1 |
| SETD1A |
| SETD1B |
| SETD2 |
| SETDB1 |
| SETDB2 |
| SEZ6L2 |
| SF3B1 |
| SH3RF1 |
| SH3RF3 |
| SHANK1 |
| SHANK3 |
| SIN3A |
| SIN3B |
| SLC1A1 |
| SLC1A2 |
| SLC22A9 |
| SLC24A2 |
| SLC25A12 |
| SLC25A27 |
| SLC38A10 |
| SLC45A1 |
| SLC4A10 |
| SLC7A5 |
| SLC7A7 |
| SLC9A6 |
| SLC9A9 |
| SLITRK2 |
| SMARCC2 |
| SMURF1 |
| SND1 |
| SNX14 |
| SOD1 |
| SON |
| SORCS3 |
| SOX5 |
| SOX6 |
| SPTBN1 |
| SRCAP |
| SRGAP3 |
| SRRM2 |
| SRSF11 |
| ST7 |
| ST8SIA2 |
| STAG1 |
| STK39 |
| STX1A |
| STXBP1 |
| STXBP5 |
| SYAP1 |
| SYNCRIP |
| SYNE1 |
| SYT1 |
| SYT17 |
| TAF1 |
| TAF6 |
| TANC2 |
| TAOK1 |
| TAOK2 |
| TBC1D23 |
| TBC1D31 |
| TBC1D5 |
| TCF20 |
| TCF4 |
| TERF2 |
| TET2 |
| TFB2M |
| TFE3 |
| THBS1 |
| TLE3 |
| TLK2 |
| TMEM39B |
| TNPO3 |
| TNRC6B |
| TNRC6C |
| TOP2B |
| TRAPPC9 |
| TRIM23 |
| TRIM33 |
| TRIP12 |
| TRPC5 |
| TRPC6 |
| TRPM1 |
| TRPM3 |
| TRPM6 |
| TRRAP |
| TSHZ1 |
| TSHZ3 |
| TSPAN17 |
| TSPAN7 |
| TTI2 |
| UBAP2L |
| UBN2 |
| UBR1 |
| UBR5 |
| UIMC1 |
| UNC13A |
| UNC5D |
| USH2A |
| USP15 |
| USP30 |
| USP45 |
| VEZF1 |
| VIL1 |
| VPS54 |
| VWA7 |
| WAC |
| WASF1 |
| WDFY3 |
| WDFY4 |
| WNK3 |
| WWP1 |
| XPO1 |
| YEATS2 |
| YWHAG |
| YY1 |
| ZBTB16 |
| ZBTB20 |
| ZC3H4 |
| ZMYM3 |
| ZMYND11 |
| ZMYND8 |
| ZNF292 |
| ZNF385B |
| ZNF626 |
| ZNF711 |
| ZNF804A |
| ZNF827 |
| ZSWIM6 |
| ZWILCH |
