# Supplementary material for: Sex-dependent prediction of autism
Source: Research Square preprint supplement (doi:10.21203/rs.3.rs-6323696/v1), 2025-07-23
Supplement: Supplementary file 2 [file a94e6e831df2c4a6b6623788.xlsx]

## Sheet: Sheet1
Test Dataset	Accuracy	AUCa	Recallb	Precisionc	F1d
SFARI genes	0.56	0.56	0.37	0.51	0.42
PRS	0.64	0.66	0.8	0.57	0.67
Fisher SNPs	0.63	0.66	0.86	0.56	0.68
Ensemble	0.68	0.72	0.77	0.61	0.69
Ensemble - Illumina	0.63	0.66	0.79	0.56	0.66
